1 **Blocking palmitoylation of *Toxoplasma gondii* myosin light**  
2 **chain 1 disrupts glideosome composition but has little impact**  
3 **on parasite motility**

4 **Pramod K. Rompikuntal<sup>1</sup>, Ian T. Foe<sup>2</sup>, Bin Deng<sup>4,5</sup>, Matthew Bogyo<sup>2,3</sup>, Gary E. Ward<sup>1\*</sup>**

5 <sup>1</sup>Department of Microbiology and Molecular Genetics, University of Vermont Larner  
6 College of Medicine, Burlington, VT 05405, USA

7 <sup>2</sup>Department of Pathology, Stanford University School of Medicine, Stanford, CA 94305,  
8 USA

9 <sup>3</sup>Department of Microbiology and Immunology, Stanford University School of Medicine,  
10 Stanford, CA 94305, USA

11 <sup>4</sup>Department of Biology & <sup>5</sup>Vermont Genetics Network Proteomics Facility, University of  
12 Vermont, Burlington VT 05405, USA

13 \* Corresponding author: Tel: (802) 656-4868, e-mail: [gary.ward@uvm.edu](mailto:gary.ward@uvm.edu)

## 14 **Abstract**

15 *Toxoplasma gondii* is a widespread apicomplexan parasite that causes severe disease in  
16 immunocompromised individuals and the developing fetus. Like other apicomplexans, *T. gondii*  
17 uses an unusual form of gliding motility to invade cells of its hosts and to disseminate throughout  
18 the body during infection. It is well established that a myosin-based motor consisting of a Class  
19 XIVa heavy chain (TgMyoA) and two light chains (TgMLC1 and TgELC1/2) plays an important  
20 role in parasite motility. The ability of the motor to generate force at the parasite periphery is  
21 thought to be reliant upon its anchoring and immobilization within a peripheral membrane-bound  
22 compartment, the inner membrane complex (IMC). The motor does not insert into the IMC  
23 directly; rather, this interaction is believed to be mediated by the binding of TgMLC1 to the  
24 IMC-anchored protein, TgGAP45. The binding of TgMLC1 to TgGAP45 is therefore considered  
25 a key element in the force transduction machinery of the parasite. TgMLC1 is palmitoylated, and  
26 we show here that palmitoylation occurs on two N-terminal cysteine residues, C8 and C11.  
27 Mutations that block TgMLC1 palmitoylation disrupt the association of TgMLC1 with the  
28 membrane fraction of the parasite in phase partitioning experiments and completely block the  
29 binding of TgMLC1 to TgGAP45. Surprisingly, the loss of TgMLC1 binding to TgGAP45 in  
30 these mutant parasites has little effect on their ability to initiate or sustain movement. These  
31 results question a key tenet of the current model of apicomplexan motility and suggest that our  
32 understanding of gliding motility in this important group of human and animal pathogens is not  
33 yet complete.

## 34 **Importance**

35 Gliding motility plays a central role in the life cycle of *T. gondii* and other apicomplexan  
36 parasites. The myosin motor thought to power motility is essential for virulence but distinctly

37 different from the myosins found in humans. Consequently, an understanding of the  
38 mechanism(s) underlying parasite motility and the role played by this unusual myosin may  
39 reveal points of vulnerability that can be targeted for disease prevention and treatment. We show  
40 here that mutations that uncouple the motor from what is thought to be a key structural  
41 component of the motility machinery have little impact on parasite motility. This finding runs  
42 counter to predictions of the current, widely-held “linear motor” model of motility, highlighting  
43 the need for further studies to fully understand how apicomplexan parasites generate the forces  
44 necessary to move into, out of and between cells of the hosts they infect.

## 45 **Introduction**

46 Toxoplasmosis is among the most widespread and common parasitic infections of humans (1).  
47 Acute infection, while typically subclinical and self-limiting, can cause life-threatening disease  
48 in immunocompromised individuals and the developing fetus. The causative agent of  
49 toxoplasmosis is the protozoan parasite, *Toxoplasma gondii*. *T. gondii* and other parasites of the  
50 phylum Apicomplexa, including those that cause malaria and cryptosporidiosis, use an unusual  
51 form of substrate-dependent gliding motility to invade into and egress from host cells, migrate  
52 across biological barriers, and disseminate through the infected host’s tissues (2-4).

53 Gliding motility in apicomplexan parasites is controlled, at least in part, by an unconventional  
54 class XIVa myosin, MyoA (5-15). According to the “linear motor” model of motility that has  
55 dominated the field for the last decade (reviewed in (16); see Fig. 1A), *T. gondii* MyoA  
56 (TgMyoA) and its associated light chains (TgMLC1 and either TgELC1 or TgELC2) are  
57 anchored to the parasite’s inner membrane complex (IMC) via the acylated glideosome-

58 associated protein, TgGAP45. TgGAP45, in turn, binds to the transmembrane proteins TgGAP40  
59 and TgGAP50. TgGAP50 is firmly immobilized within the IMC lipid bilayer, potentially serving  
60 as a fixed anchor against which the motor complex can generate force (17, 18). This large,  
61 heterooligomeric protein complex (TgMyoA, its light chains, TgGAP40, TgGAP45 and  
62 TgGAP50) is referred to as “the glideosome”. In the linear motor model, short actin filaments  
63 located between the parasite plasma membrane and the IMC are connected to ligands on the  
64 substrate through a glideosome-associated connector protein (GAC; (19)) that binds to the  
65 cytosolic tails of surface adhesins. Because the motor is anchored into the IMC, when the motor  
66 displaces the fixed actin filaments rearward, the parasite moves forward relative to the substrate  
67 (Fig. 1A).

68 TgMLC1 is thought to play two key roles within the *T. gondii* glideosome. First, TgMLC1 binds  
69 to the C-terminal tail of TgMyoA to reinforce the motor’s lever arm (10, 13, 20). The lever arm  
70 amplifies small motions at the myosin active site into larger movements that are capable of  
71 displacing actin filaments (10, 21). Consistent with this proposed function, recombinant  
72 TgMyoA is inactive in *in vitro* motility assays in the absence of TgMLC1 ((10) and unpublished  
73 data). Second, an interaction between the N-terminal portion of TgMLC1 and the C-terminal  
74 portion of TgGAP45 is believed to be the critical link that tethers the motor to the IMC (Fig. 1A;  
75 (22, 23). Given these proposed functions, is not surprising that TgMLC1 is an essential protein,  
76 and parasites depleted of TgMLC1 are significantly impaired in 3D motility, invasion, and host  
77 cell egress (24, 25).

78 While the importance of TgMyoA, TgMLC1 and the other glideosome components in motility is  
79 well established, recent data have called into question whether they are organized and function as  
80 described by the linear motor model and/or whether alternative motility mechanisms exist (24-

81 29). For example, the ability of apicomplexan parasites to rock back and forth on a substrate  
82 along their anterior to posterior axis (30-36) is hard to reconcile with the linear motor model, as  
83 is the ability of parasites engineered to lack key components of the glideosome to continue  
84 moving ((24-26); see also (37)). Given the central importance of motility in the parasite's life  
85 cycle and virulence, it is important to fully understand how these proteins work together to  
86 generate the forces required to drive parasite movement.

87 S-palmitoylation is the reversible covalent attachment of a 16-carbon saturated fatty acid via a  
88 thioester linkage to cysteine residues of integral and peripheral membrane proteins (38, 39). This  
89 widespread post-translational modification of proteins mediates membrane association and can  
90 regulate subcellular localization, trafficking, structure, stability and diverse aspects of protein  
91 function (38, 40-42). Palmitoylation is thought to play an important role in the biology of *T.*  
92 *gondii* and other apicomplexan parasites (43-54). Recent chemical proteomic studies identified  
93 several hundred putatively palmitoylated proteins in *T. gondii* (282 unique proteins in one study  
94 (54) and 401 in another (44)). Surprisingly, these proteins included all components of the  
95 glideosome, including TgMLC1 (44, 54).

96 TgMLC1 contains five cysteine residues (Fig. 1B), two of which (C8 and C11) are predicted by  
97 CSS-Palm 4.0 to be potential sites of palmitoylation. These two cysteines are found within the  
98 apicomplexan-specific N-terminal extension of TgMLC1 (Fig. 1B), which is the region of the  
99 protein that binds to TgGAP45 ((23); Fig. 1A). Given the important role that TgMLC1 is thought  
100 to play in TgMyoA function and motility, we sought to experimentally confirm C8 and/or C11 as  
101 the sites of TgMLC1 palmitoylation and to explore the phenotypic consequences of mutations  
102 that block this modification.

## 103 **Results**

### 104 **Identification of the sites of palmitoylation on TgMLC1**

105 To determine whether C8 and/or C11 are sites of palmitoylation on TgMLC1, we replaced the  
106 endogenous *TgMLC1* gene with mutant alleles that produce either single (C8S, C11S) or double  
107 (C[8,11]S) cysteine to serine mutations, rendering these sites non-palmitoylatable. Each mutant  
108 protein was also FLAG-tagged at its N-terminus (Fig. S1; see Table S1 for a list of parasite  
109 strains used in this study and their designations). A fourth parasite line expressing FLAG-tagged  
110 wild-type TgMLC1 was similarly generated (WT). To determine the effect (if any) of the  
111 mutations on TgMLC1 palmitoylation, WT, C8S, C11S and C(8,11)S parasites were grown in  
112 the palmitic acid analog, 17-octadecynoic acid (17-ODYA). FLAG-tagged TgMLC1 was then  
113 immunoprecipitated and subjected to SDS-PAGE. Because 17-ODYA contains a terminal alkyne  
114 group, it can be fluorescently tagged with rhodamine-azide through a copper-catalyzed  
115 cycloaddition reaction; the amount of rhodamine bound to proteins in the immunoprecipitate can  
116 then be visualized by fluorescence scanning (54). The amount of rhodamine fluorescence  
117 associated with TgMLC1 (31 kDa) was significantly reduced in both the C8S and C11S mutants  
118 compared to WT, with C8S showing a greater reduction than C11S (Fig. 2). In the C(8,11)S  
119 double mutant, no 17-ODYA TgMLC1 labeling above background was detectable. In a previous  
120 study, C8 and/or C11 were speculated to be sites of palmitoylation on TgMLC1, and parasites  
121 expressing a second copy of TgMLC1 in which these two cysteines were mutated to alanines  
122 were generated (23). To compare our results to theirs, we generated a C(8,11)A allelic  
123 replacement line and found that, like the C(8,11)S double mutation, the C(8,11)A double

124 mutation completely blocked 17-ODYA labeling (Fig. 2). Taken together, these data identify C8  
125 and C11 as essential for, and very likely the sites of, palmitoylation on TgMLC1.

### 126 **Subcellular localization of non-palmitoylatable TgMLC1**

127 TgMLC1 normally localizes uniformly around the parasite periphery (55). It was previously  
128 reported that the C(8,11)A double mutation caused TgMLC1 to mislocalize to the cytosol (23). It  
129 was therefore surprising that, in our hands, both the C(8,11)S and C(8,11)A mutant proteins  
130 remained localized at the parasite periphery (Fig. 3). Re-examination of the images shown in  
131 Frenal *et al.* (2010) revealed that most of the C(8,11)A mutant protein (named MLC1<sup>CC-AA</sup> in  
132 that study) was indeed also found at the parasite periphery, although there was a minor amount in  
133 the cytosol (for comparison, see the localization of a different mutant in that same study, MLC1-  
134 PGF<sup>AIA</sup>, which was clearly cytosolic (23)). The fact that we detect little to no cytosolic staining  
135 with the C(8,11)A allele may reflect differences between the two studies in protein expression  
136 levels, since our mutant protein was expressed from the endogenous promoter at the endogenous  
137 locus whereas the previous study expressed the mutant gene in parasites also expressing the  
138 wild-type allele (23). Taken together, these data show that mutations that block TgMLC1  
139 palmitoylation do not appreciably alter its localization at the parasite periphery.

### 140 **Blocking palmitoylation of TgMLC1 alters its phase partitioning in Triton X-114**

141 Next, we tested whether the mutations that block TgMLC1 palmitoylation within the parasite  
142 alter the phase partitioning of the protein in the non-ionic detergent Triton X-114 (TX-114). TX-  
143 114 efficiently solubilizes most proteins in the parasite at 4°C; when subsequently warmed above  
144 the cloud point of the detergent (20°C), intermicellar interactions cause the solution to separate  
145 into aqueous and detergent phases, which are enriched in hydrophilic and integral membrane

146 proteins, respectively (56, 57). WT, C8S and C11S TgMLC1 each partition roughly equally into  
147 the aqueous and detergent phases, but the C(8,11)S TgMLC1 double mutant is found almost  
148 entirely in the aqueous phase (Figs. 4A and S2), suggesting a lack of direct membrane  
149 association in the absence of palmitoylation. Similar results were seen with the C(8,11)A double  
150 mutant (Fig. 4A). As a control, the same samples were probed for TgGRA8, a dense granule  
151 protein (58) unrelated to TgMLC1. As expected, the phase partitioning of TgGRA8 was  
152 relatively unaffected by the TgMLC1 mutations (Figs. 4B and S2). These data suggest that the  
153 peripheral localization we observed for the C(8,11)S and C(8,11)A TgMLC1 mutants is likely  
154 mediated by interaction with other membrane-associated protein(s), rather than by a direct  
155 association with the lipid bilayer itself.

#### 156 **Effects of TgMLC1 palmitoylation on the composition of the glideosome**

157 In the 17-ODYA labeling experiments, two prominently labeled ~50 kDa proteins were  
158 recovered in the FLAG-WT pulldowns in addition to FLAG-tagged TgMLC1, and these bands  
159 were not present in pulldowns from either the C(8,11)S or C(8,11)A double mutant (Fig. 2,  
160 asterisk). It was previously suggested that proteins of this size copurifying with WT TgMLC1  
161 but not C(8,11)A might be other members of the glideosome complex (23). This hypothesis was  
162 strengthened by our subsequent observation that most, if not all, glideosome components are  
163 palmitoylated (54). We therefore analyzed the FLAG pulldowns of C8S, C11S and C(8,11)S  
164 parasites by western blot with antibodies against TgGAP45, TgELC1 and TgMyoA. As  
165 expected, TgGAP45 was recovered in the FLAG pulldown from parasites expressing WT  
166 TgMLC1; in striking contrast, virtually no TgGAP45 was recovered in FLAG pulldowns from  
167 parasites expressing C(8,11)S TgMLC1 (Fig. 5A). Pulldowns from parasites expressing the C8S  
168 and C11S single mutations contain intermediate levels of TgGAP45. Quantification of the



169 western blot signals confirmed these observations, and revealed that concomitant with the  
170 decrease in TgGAP45 in the IP of the double mutant, there was a 2-3-fold increase in the amount  
171 of TgELC1 and TgMyoA recovered (Fig. 5B). Similar results were seen with the C(8,11)A  
172 mutant (Fig. S3). The lack of TgGAP45 in the IP from the double mutant is not due to changes in  
173 TgGAP45 expression in this parasite line, as western blots of parasite lysate before  
174 immunoprecipitation show similar amounts of TgGAP45 (Fig. 5A and S3, “input”). Similarly,  
175 anti-TgMyoA western blots of whole parasite lysates reveals no changes in the level of  
176 expression of TgMyoA in either the C(8,11)S or C(8,11)A mutant parasite lines (Fig. S4).  
177 Blocking TgMLC1 palmitoylation seems to therefore block its ability to interact with TgGAP45,  
178 while simultaneously increasing its interaction with TgMyoA and TgELC1.

### 179 **Effect of TgMLC1 palmitoylation on parasite motility**

180 Given the dramatic effect of the C(8,11)S double mutation on the binding of TgMLC1 to  
181 TgGAP45, we expected to see a major impact on parasite motility. However, the motility of the  
182 double mutant parasites was indistinguishable from parasites expressing WT TgMLC1 in terms  
183 of motility initiation, mean displacement, mean speed and maximum speed (Fig. 6). Track  
184 length was slightly shorter in the C(8,11)S parasites, but still reached 88% of WT levels. Thus,  
185 parasites in which TgMLC1 has lost its ability to interact with TgGAP45 nevertheless show near  
186 normal motility.

187 This result was unexpected since, according to the linear motor model of motility, disruption of  
188 the interaction between TgMLC1 and TgGAP45 should uncouple TgMyoA from the IMC,  
189 rendering it incapable of generating the force required for movement ((23); Fig. 1A). We  
190 therefore investigated whether the near normal motility observed in the mutants could be due to

191 changes in the composition of the glideosome that could functionally compensate for the lack of  
192 TgMLC1-TgGAP45 interaction, such as the association of TgGAP45 with an alternative light  
193 chain/myosin motor, or interaction of either TgMLC1 or TgMyoA with alternative GAP  
194 proteins.

195 First, we asked whether TgGAP45 associates with any new proteins in the absence of its normal  
196 interaction with TgMLC1. Parasites expressing either WT or C(8,11)S TgMLC1 were  
197 metabolically labeled with <sup>35</sup>S-methionine/cysteine and the labeled proteins that co-  
198 immunoprecipitated with TgGAP45 were resolved by SDS-PAGE, transferred to a PVDF  
199 membrane and visualized by phosphorimaging. The same membrane used for phosphorimaging  
200 was subsequently processed for western blotting with antibodies against TgMyoA, TgGAP45  
201 and TgMLC1 to determine which of the <sup>35</sup>S-labeled bands comigrate with which of the  
202 glideosome proteins. As expected, both TgMyoA and TgMLC1 co-immunoprecipitate with  
203 TgGAP45 from <sup>35</sup>S-labeled WT parasites, whereas neither protein is recovered in TgGAP5  
204 pulldowns from C(8,11)S parasites (Fig. 7A), confirming that the motor does not bind to  
205 TgGAP45 in the absence of TgMLC1 palmitoylation. No <sup>35</sup>S-labeled bands were detected in the  
206 TgGAP45 pulldowns from C(8,11)S parasites that were not also present in the pulldowns from  
207 WT parasites (Fig. 7A). TgGAP45 therefore does not appear to interact to any  
208 significant/stoichiometric extent with alternate <sup>35</sup>S-labeled myosins or myosin light chains when  
209 its interaction with TgMLC1 is disrupted by the C(8,11)S mutation.

210 We did a similar experiment to see if TgMyoA interacts with alternative GAP(s) (23) or other  
211 proteins in the C(8,11)S mutant, proteins that might serve to anchor TgMyoA into the IMC in the  
212 absence of a normal TgMLC1-TgGAP45 interaction. First, we Ty-tagged TgMyoA at the  
213 endogenous *TgMyoA* locus in both the WT and C(8,11)S backgrounds using CRISPR/Cas9 (Fig.

214 S5). We then analyzed Ty pulldowns from <sup>35</sup>S-labeled WT and C(8,11)S parasites. Ty-tagged  
215 TgMyoA and associated TgMLC1 were recovered in the Ty pulldowns from both parasite lines  
216 and, as expected, TgGAP45 was only recovered in pulldowns from WT parasites (Fig. 7B).  
217 Again, no <sup>35</sup>S-labeled proteins were seen to associate with TgMyoA in the C(8,11)S parasites  
218 that were not also detected in WT parasites, so there is no evidence that TgMyoA interacts with  
219 new binding partners in the C(8,11)S double mutant (Fig. 7B).

220 Finally, we tested whether the mutant C(8,11)S TgMLC1 itself might interact with a different  
221 IMC-anchored protein(s) that could functionally compensate for its lack of interaction with  
222 TgGAP45. Anti-FLAG IPs from <sup>35</sup>S-labeled WT and C(8,11)S parasites again confirmed the  
223 western blotting results presented in Figs. 5 and S3: compared to WT TgMLC1, C(8,11)S  
224 TgMLC1 shows both a greatly reduced interaction with TgGAP45 and an increased interaction  
225 with TgMyoA (Fig. 7C; quantitative western blot results from the same sample are shown in Fig.  
226 S6). However, in this experiment we also saw a marked increase in the amount of an ~80kDa  
227 kDa <sup>35</sup>S-labeled protein co-immunoprecipitating with C(8,11)S TgMLC1 compared to WT  
228 TgMLC1 (Fig 7C, asterisk). This was intriguing since TgGAP80, a TgGAP45-related protein  
229 that normally interacts with TgMyoC, is also reportedly capable of interacting with TgMLC1  
230 (59). This raised the possibility that an increased interaction between C(8,11)S TgMLC1 and  
231 TgGAP80 might functionally compensate for the loss of interaction between TgMLC1 and  
232 TgGAP45 in the mutant parasites. We therefore repeated the FLAG-TgMLC1 pulldowns on a  
233 preparative scale and determined the identity of each of the major bands recovered by  
234 LC/MS/MS (Fig. S7 and Tables S1-S10). The ~80kDa band proved to be a truncated form of  
235 TgMyoA rather than TgGAP80, and the increased levels of this TgMyoA fragment in the  
236 C(8,11)S pulldown paralleled the increased levels of full-length TgMyoA. Taken together, these

237 data argue that the near normal motility seen in C(8,11)S parasites cannot be explained by the  
238 binding of either TgGAP45 or components of the motor to alternative proteins that could  
239 functionally compensate for the lack of interaction between TgMLC1 and TgGAP45.

## 240 **Discussion**

241 The apicomplexan glideosome plays a critical role in parasite motility, invasion and virulence.  
242 Recent palmitome analyses have revealed that all known components of the *T. gondii*  
243 glideosome are palmitoylated, including TgMyoA, TgMLC1, TgELC1, TgGAP40, TgGAP45  
244 and TgGAP50 (44, 54). Widespread glideosome palmitoylation has also been reported in *P.*  
245 *falciparum* (51, 60). Two of the *T. gondii* palmitoyl S-acyl transferases that are essential for  
246 parasite survival (TgDHHC2, TgDHHC14) localize to the IMC (61, 62) and are therefore well-  
247 situated to play a role in glideosome palmitoylation. The function of palmitoylation of one  
248 glideosome component, TgGAP45, was established in an elegant set of experiments by Frenal,  
249 Soldati-Favre and colleagues (23). Their study showed that C-terminal palmitoylation of  
250 TgGAP45 anchors its C-terminus in the IMC, while the other end of the protein is anchored in  
251 the plasma membrane via N-terminal palmitoylation and myristoylation. Acylation on the two  
252 ends of the protein therefore enables TgGAP45 to bridge the gap between the IMC and the  
253 plasma membrane; this determines the spacing between the two membranes and maintains the  
254 integrity of the parasite pellicle (23). The function of palmitoylation of other glideosome  
255 components is not known, and in most cases the specific residues palmitoylated on these other  
256 proteins have not been determined. We have focused here on the function of TgMLC1  
257 palmitoylation.

258 In the linear motor model of motility, TgMLC1 plays two key roles in force generation: it  
259 stabilizes the TgMyoA lever arm (10, 13, 20), and it serves as a physical linker connecting the  
260 TgMyoA motor to TgGAP45 and the IMC (22, 23). We show here that TgMLC1 is dually  
261 palmitoylated, on C8 and C11 (Fig. 2). When we block palmitoylation by mutating these sites to  
262 either serine or alanine, TgMLC1 shows reduced association with the membrane fraction in  
263 phase-partitioning experiments (Fig. 4) and the mutant TgMLC1 no longer co-  
264 immunoprecipitates with TgGAP45 (Figs. 5, S3). Nevertheless, the non-palmitoylated protein  
265 continues to localize at the parasite periphery (Figs. 3, S1) and the motility of parasites  
266 expressing the mutant protein is in most aspects indistinguishable from wild-type parasites (Fig.  
267 6).

268 How does palmitoylation of C8 and C11 affect the ability of TgMLC1 to bind TgGAP45? The  
269 detailed mechanism by which the N-terminus of TgMLC1 binds to the C-terminus of TgGAP45  
270 (23) is unknown. Direct protein-protein interaction may be involved, as the mutation of two other  
271 sets of conserved N-terminal amino acids in TgMLC1 (D26E28 and P36GF38) also interfere  
272 with binding to TgGAP45 (23). The presence of the palmitates on C8 and C11 of TgMLC1  
273 might help the interacting N-terminal residues of TgMLC1 transition from a disordered state (13,  
274 20) into a binding-competent configuration. Alternatively, by inserting into the IMC membrane,  
275 the acyl chains could position the relevant N-terminal residues of TgMLC1 favorably for  
276 interaction with the C-terminus of TgGAP45, which is itself attached to the IMC membrane via  
277 palmitoylation. It is also possible that the acyl chains on TgMLC1 and TgGAP45 themselves  
278 interact within the plane of the membrane (20). In any of these cases, blocking TgMLC1  
279 palmitoylation would be expected to inhibit TgMLC1-TgGAP45 interaction, as observed. It is  
280 unlikely that palmitoylation is necessary for proper folding and stability of TgMLC1, as appears

281 to be the case with the *P. falciparum* MLC1 homolog, MTIP (51), since (a) we see no evidence  
282 for increased degradation of the C(8,11)S mutant compared to WT TgMLC1 (Fig. S4) and (b)  
283 the palmitoylation-deficient mutants continue to bind to TgMyoA (*e.g.*, Fig 5).

284 Our data argue against the model that binding to TgGAP45 is what localizes TgMLC1 (and,  
285 therefore, TgMyoA) to the parasite periphery and anchors the motor in the IMC membrane. We  
286 showed that palmitoylation-deficient TgMLC1 no longer interacts with TgGAP45, yet both  
287 TgMLC1 (Figs. 3, S1) and TgMyoA (Fig. S5) continue to localize to the periphery in these  
288 mutant parasites. Previous studies with parasites expressing mutant TgGAP45 also argue against  
289 a model in which the localization of TgMLC1 is determined by TgGAP45: TgGAP45 lacking its  
290 C-terminal palmitoylation sites becomes dissociated from the IMC, yet TgMLC1 nevertheless  
291 remained IMC associated (23). It is not clear how palmitoylated TgMLC1 located within the  
292 space between the IMC and plasma membrane would be targeted to the IMC rather than the  
293 plasma membrane, if not through TgGAP45. The simplest hypothesis is that it interacts directly  
294 with one of the other resident proteins of the IMC, such as the transmembrane proteins  
295 TgGAP40 or TgGAP50. Alternatively, insertion of TgMLC1 into the IMC could be a direct  
296 consequence of binding to (63) and/or palmitoylation by IMC-localized palmitoyl S-acyl  
297 transferases (61, 62).

298 The most unexpected result of this study was that the motility of parasites expressing C(8,11)S  
299 TgMLC1 was in most aspects indistinguishable from wild-type parasites (Fig. 6). This  
300 observation suggests that the coupling of the motor complex to the IMC via TgGAP45 is  
301 unnecessary for force generation by the parasite, and directly contradicts a fundamental tenet of  
302 the linear motor model of motility. The near normal motility observed in the mutants does not  
303 appear to be due to compensatory changes in glideosome composition in response to the

304 mutations (*i.e.*, TgGAP45 does not associate with alternative myosin light chain(s) or myosin  
305 motor(s) in the C[8,11]S mutant, nor does the mutant TgMLC1 or TgMyoA interact with  
306 alternative GAP proteins; Fig. 7). It remains formally possible that non-palmitoylatable TgMLC1  
307 binds to TgGAP45 in the parasite, with a reduced affinity that is sufficient to maintain its  
308 association with the IMC and support motility but insufficient to survive detergent extraction and  
309 immunoprecipitation. While it is difficult to experimentally exclude this possibility, most  
310 previous studies of glideosome composition and function have utilized a similar nonionic  
311 detergent extraction/immunoprecipitation approach, which constitutes the operational definition  
312 of the glideosome (17, 18, 23). Furthermore, our phase partitioning experiments independently  
313 suggest that the mutant TgMLC1 has indeed lost its association with the IMC membrane.  
314 Finally, recent data demonstrate that parasites lacking TgMLC1 altogether have a defect in  
315 motility initiation, but those parasites that continue to move do so at normal speeds (25).

316 At a minimum, our data demonstrate that TgMLC1 palmitoylation affects its binding to  
317 TgGAP45 but this palmitoylation plays little to no role in parasite motility, as assayed by the  
318 most sensitive and quantitative assays currently available. The data also show clearly that the  
319 inhibitory effects of the palmitoylation inhibitor 2-bromopalmitate on parasite motility are not  
320 due to changes in palmitoylation of TgMLC1, as previously hypothesized, although changes in  
321 the palmitoylation of other glideosome components could be involved (64). While the data  
322 presented here do not, by themselves, disprove the linear motor model of motility, they add to a  
323 growing list of evidence (24-29, 33) suggesting that the mechanisms underlying apicomplexan  
324 parasite motility are more complicated than what is currently encapsulated by the linear motor  
325 model. How the different motility-associated proteins of the parasite interact and work together

326 to generate the forces necessary to drive parasite movement and whether more than one  
327 underlying mechanism exists remain important open questions for future study.

## 328 **Materials and Methods**

### 329 **Parasite culture**

330 *T. gondii* tachyzoites were maintained by serial passage in confluent monolayers of human  
331 foreskin fibroblasts (HFFs) (ATCC CRL-1634) grown in Dulbecco's Modified Eagle's Medium  
332 (DMEM), supplemented with 10% (v/v) heat-inactivated fetal bovine serum (FBS) and 10 mM  
333 HEPES, pH 7.0, as previously described (65). The medium was changed to DMEM  
334 supplemented with 1% (v/v) heat-inactivated FBS and 10 mM HEPES pH 7.0 prior to infection  
335 of confluent HFFs with parasites.

### 336 **Generation of TgMLC1 knock-in mutants by allelic replacement**

337 Mutations were introduced into a previously described *TgMLC1* allelic replacement plasmid (55)  
338 using the Quick Change site-directed mutagenesis kit (Agilent Technologies). *E. coli* were  
339 transformed with the mutagenized plasmids and colonies screened by colony PCR and restriction  
340 digestion. The entire open reading frame was sequenced to confirm the presence of only the  
341 desired mutation(s). The allelic replacement plasmid was linearized with BglII and PciI and used  
342 to transfect RH $\Delta ku80\Delta HXGPRT$  parasites. Successful integration of the mutated gene at the  
343 endogenous locus yields phleomycin-resistant, FLAG-positive parasites. Parasites were therefore  
344 subjected to two rounds of phleomycin selection, cloned by limiting dilution and characterized  
345 by anti-FLAG immunofluorescence and immunoblotting, as well as diagnostic PCR to confirm  
346 correct integration on the chromosome (see Fig. S1). Finally, the presence of the desired  
347 mutations in individual clones was confirmed by sequencing of genomic DNA.



## 348 **Labeling with 17- ODYA**

349 ODYA labeling was performed as described previously (54).

## 350 **Epitope tagging of the *TgMyoA* locus using CRISPR/Cas9**

351 To insert the coding sequence for a Ty epitope tag at the C-terminus of *TgMyoA*, we constructed  
352 plasmid pU6-MyoA, which contains the *TgMyoA* targeting chiRNA under the U6 promoter and  
353 *Cas9* under the *TUB1* promoter (66). First, we synthesized a dsDNA oligo encoding the  
354 protospacer sequence used to direct Cas9 to the C-terminal region of *TgMyoA*. To fuse the  
355 *TgMyoA* protospacer to the chiRNA of the pU6-universal plasmid, forward and reverse oligos  
356 corresponding to the *TgMyoA* 3' region were annealed by combining them (20µl each, 200µM  
357 stocks) in duplex buffer (100mM potassium acetate; 30mM HEPES pH 7.5), heating them to  
358 100°C for 2 minutes, then slowly cooling them to 25°C and letting them stand overnight to  
359 generate double-stranded product. The duplexed oligos were dialyzed against deionized water,  
360 phosphorylated using T4 polynucleotide kinase, and heat inactivated. Meanwhile, the pU6-  
361 universal plasmid (5µg) was linearized by digesting with BsaI, dephosphorylated with Antarctic  
362 phosphatase, heat inactivated and PCR purified. The phosphorylated, duplexed oligos were then  
363 ligated into the pU6-universal plasmid to generate pU6-MyoAPS. Competent *E. coli* DH5- $\alpha$   
364 were transformed with the pU6-MyoAPS ligation mixture, and individual colonies with the  
365 desired plasmid identified first by colony PCR, then by diagnostic PCR and sequencing. pU6-  
366 MyoAPS was transfected along with duplexed, dialyzed homologous recombination (HR) oligos  
367 into WT and C(8,11)S parasites. Ty-positive parasites were identified by immunofluorescence,  
368 cloned by limiting dilution and confirmed as expressing TgMyoA-Ty from the endogenous

369 *TgMyoA* locus by immunofluorescence, diagnostic PCR (see Fig. S5), and sequencing of  
370 genomic DNA.

### 371 **Immunofluorescence**

372 HFF cells were infected for 15h and fixed with 4% (v/v) paraformaldehyde in PBS (15 min,  
373 25°C). Fixed cells were washed and permeabilized with PBS containing 0.25% (v/v) Triton-X-  
374 100 for 20 minutes, washed 3 times with PBS and blocked (30 min, 25°C ) in Block buffer (PBS  
375 containing 1% [w/v] BSA). The cells were then incubated for 1hr with primary antibodies  
376 diluted as follows with Block buffer: mouse monoclonal anti-FLAG (Sigma Aldrich) at 1:500;  
377 rabbit anti-GAP45 polyclonal serum (a generous gift from Dr. Con Beckers (17)) at 1:1000;  
378 rabbit anti-MyoA polyclonal serum (67) at 1:20; and rabbit anti-ELC1 polyclonal serum at  
379 1:500. Samples were washed 3 times and incubated a further 30 min in goat-anti-rabbit IgG  
380 conjugated to Alexa fluor 546 (Invitrogen) or goat-anti-mouse IgG conjugated to Alexa fluor 488  
381 (Invitrogen), each diluted 1:500 in Block buffer. After four final washes in PBS, fluorescence  
382 was visualized by epifluorescence microscopy.

### 383 **Immunoprecipitation**

384 For anti-FLAG immunoprecipitations,  $2 \times 10^7$  freshly egressed parasites were extracted for 45  
385 minutes on ice in 3 ml of FLAG lysis buffer (10 mM imidazole pH 7.4, 300 mM NaCl, 1 mM  
386 EGTA, 5 mM MgCl<sub>2</sub>, 1 % (w/v) TX-100, 2 mM DTT, 2mM ATP) containing 1:100 (v/v)  
387 protease inhibitors (Sigma #P8340). The extract was divided into two equal portions and  
388 insoluble material was pelleted at 10,000xg (30 min, 4°C). Each ~1.5 ml of supernatant was used  
389 to resuspend 20 ul of packed anti-FLAG M2 affinity resin (Sigma), then rocked gently overnight  
390 at 4°C. After three washes with the FLAG wash buffer (FLAG lysis buffer containing 1:500

391 (v/v) protease inhibitors), bound proteins from the pooled washed resin were eluted with 100 $\mu$ g  
392 of FLAG peptide (Sigma) in FLAG wash buffer. Eluates were resolved by SDS-PAGE and  
393 proteins visualized by immunoblotting. Primary and secondary (IRDye 680-conjugated anti-  
394 rabbit IgG and IRDye 800-conjugated anti-mouse IgG) antibodies were diluted for use in  
395 Odyssey blocking buffer (LI-COR). The blots were scanned using an Odyssey CLx infrared  
396 imager (LI-COR). Images were processed using Image Studio software (LI-COR). Signal  
397 intensities of bands being compared were normalized as described in the figure legends.

### 398 **<sup>35</sup>S-Metabolic labeling**

399 For <sup>35</sup>S metabolic labeling, confluent HFF cells in a T75 flask were infected with 1x10<sup>7</sup>  
400 tachyzoites and incubated for 16-20 hours. The infected cells were then incubated in  
401 methionine/cysteine-free DMEM (GIBCO) containing 1% (v/v) FBS for 1 hr, followed by 24 hr  
402 in DMEM containing 500 $\mu$ Ci <sup>35</sup>S-Easytag mix (Perkin Elmer). Infected cells were detached from  
403 the flask using a cell scraper, washed twice with ice-cold PBS, and lysed in FLAG lysis buffer  
404 for anti-FLAG immunoprecipitation, or TX-100 lysis buffer (1% v/v TX-100, 50 mM Tris HCl  
405 pH 8.0, 150 mM NaCl, 2 mM EDTA and 1:200 (v/v) protease inhibitors) for anti-Ty and anti-  
406 GAP45 immunoprecipitations. Immunoprecipitation was performed as described above except  
407 that, after incubation with primary antibody, protein A-Sepharose (Invitrogen) was added and  
408 incubated for 1hr with gentle agitation at 4°C to collect the immune complexes. After three  
409 washes with either FLAG wash buffer or TX-100 IP wash buffer (1% v/v TX-100, 50 mM Tris,  
410 pH 8.0, 150 mM NaCl, 5 mM EDTA and 1:500 protease inhibitors), bound proteins were eluted  
411 in SDS-PAGE sample buffer by boiling at 100°C for 5 minutes. Samples were then resolved by  
412 SDS-PAGE, and transferred to PVDF membranes for phosphorimaging and immunoblotting.

#### 413 **Phase separation of parasite proteins in Triton X-114**

414 The phase separation was performed as previously described (56-58). Briefly,  $4 \times 10^8$  tachyzoites  
415 were extracted in 1 ml extraction buffer (10 mM Tris-HCl, pH 7.4, 150 mM NaCl, 0.5% (v/v)  
416 precondensed TX-114 (Pierce) and 1:100 [v/v] dilution of protease inhibitors) for 90 minutes on  
417 ice. Insoluble material was removed by centrifugation (twice at 13,000xg for 5 min at 4°C). The  
418 cleared extract was overlaid onto a 750  $\mu$ l prechilled sucrose cushion (6% [w/v] sucrose, 10 mM  
419 Tris-HCl, pH 7.4, 150 mM NaCl and 0.06% [v/v] precondensed Triton X-114), incubated for 5  
420 minutes at 37°C and centrifuged to separate the detergent and aqueous phases by centrifugation  
421 (37°C, 3000xg, 5 min). Partitioning was repeated once on each phase and the collected samples  
422 were resolved by SDS-PAGE and analyzed by sequential incubations of a single western blot  
423 with anti-TgMyoA, -TgGAP45, -TgMLC1 and -TgELC1, followed by the appropriate secondary  
424 antibodies.

#### 425 **Motility assays**

426 3D motility assays in Matrigel were performed as previously described (55, 68).

#### 427 **Protein identification by mass spectrometry analysis**

428 Dried tryptic peptides recovered from excised gel bands (69) were dissolved in 10  $\mu$ l 0.1%  
429 formic acid and 2.5% acetonitrile, and 2  $\mu$ l were analyzed on the Thermo Q-Exactive mass  
430 spectrometer coupled to an EASY-nLC system (Thermo Fisher). Peptides were separated on a  
431 fused silica capillary (12 cm x 100  $\mu$ m I.D) packed with Halo C18 (2.7  $\mu$ m particle size, 90 nm  
432 pore size, Michrom Bioresources) at a flow rate of 300 nl/min. Peptides were introduced into the  
433 mass spectrometer via a nanospray ionization source at a spray voltage of 2.2 kV. Mass

434 spectrometry data were acquired in a data-dependent top-10 mode, and the lock mass function  
435 was activated (m/z, 371.1012). Full scans were acquired from m/z 350 to 1,600 at 70,000  
436 resolution (automatic gain control [AGC] target, 1e6; maximum ion time [max IT], 100 ms;  
437 profile mode). Resolution for dd-MS<sup>2</sup> spectra was set to 17,500 (AGC target: 1e5) with a  
438 maximum ion injection time of 50 ms. The normalized collision energy was 27 eV. A gradient of  
439 0 to 40% acetonitrile (0.1% FA) over 55 min was applied. The spectra were searched against the  
440 *T. gondii* protein database (<http://www.toxodb.org/toxo/>) by Proteome Discoverer (PD) 2.0. The  
441 search parameters permitted a 10 ppm precursor MS tolerance and a 0.02 Da MS/MS tolerance.  
442 Carboxymethylation of cysteines was set up as fixed modification and Oxidation of methionine  
443 (M) was allowed as variable modification. Up to three missed tryptic cleavages of peptides were  
444 considered with the false-discovery rate set to 1% at the peptide level.

## 445 **Figure and Table Legends**

446 **Figure 1. Schematic illustrations of the glideosome and TgMLC1 domain structure. (A)** In  
447 the linear motor model of motility (reviewed in (16)), the TgMyoA motor (TgMyoA and its  
448 associated light chains, TgMLC1 and either TgELC1 or TgELC2) is anchored to the parasite's  
449 inner membrane complex (IMC) via the acylated glideosome-associated protein, TgGAP45, and  
450 the transmembrane proteins TgGAP40 and TgGAP50. The luminal portion of GAP50 is thought  
451 to interact with GAPM, a protein that spans the inner IMC membrane, and which likely connects  
452 the entire glideosome to the underlying parasite cytoskeleton. Short actin (TgACT1) filaments  
453 located between the parasite plasma membrane and the IMC are connected to ligands on the  
454 substrate through a linker protein, possibly the glideosome-associated connector protein (GAC),  
455 which binds to the cytosolic tails of surface adhesins such as TgMIC2. The TgMyoA motor

456 displaces the actin filaments rearward; because the motor is connected to the IMC and the actin  
457 is connected to the substrate, this causes the parasite to move forward relative to the substrate.  
458 The depiction of a pair of acyl chains on the N-terminus of TgMLC1 (red squiggles) and their  
459 interaction with the IMC membrane is based on results reported here. **(B)** TgMLC1 consists of a  
460 44-amino acid N-terminal extension, a central disordered region, and four EF hand-like domains,  
461 which interact with the tail of TgMyoA. The positions of the five cysteines in the protein are  
462 shown in blue; CSS-Palm 4.0 predicted C8 and C11 as likely sites of palmitoylation.

463 **Figure 2. Cys8 and Cys11 are the likely sites of palmitoylation on TgMLC1.** Parasites  
464 expressing either wild-type (WT) or mutant FLAG-tagged TgMLC1 were labeled with the  
465 palmitic acid analog 17-ODYA, and anti-FLAG resin was then used to pull down FLAG-  
466 TgMLC1 and associated proteins. The proteins in the pulldown were resolved by SDS-PAGE  
467 and visualized either by rhodamine fluorescence scan (upper panel), to show the position of 17-  
468 ODYA in the gel, or by western blotting with anti-TgMLC1 (lower panel). Numbers on the left  
469 indicate molecular mass in kDa; only the ~30kDa portion of the western blot is shown. The  
470 predominant ~31-kDa ODYA-labeled band comigrates with FLAG-TgMLC1; its labeling  
471 intensity is reduced in the C8S and C11S single mutants and abolished completely in the  
472 C(8,11)S and C(8,11)A double mutants. The western blot shows similar protein loads in all  
473 samples. The asterisk indicates a doublet of ODYA-labeled proteins at ~50kDa that is pulled  
474 down with wild-type FLAG-TgMLC1 but not with either of the double mutants – see text for  
475 details.

476 **Figure 3. C(8,11)S and C(8,11)A mutations do not affect localization of TgMLC1 to the**  
477 **parasite periphery.** Infected HFF cells were fixed, permeabilized and stained for FLAG-tagged  
478 TgMLC1 (red) or TgGAP45 (green). The corresponding merged and DIC images are also

479 shown. Upper panels compare the localization of WT *vs.* C(8,11)S TgMLC1; lower panels  
480 compare WT *vs.* C(8,11)A TgMLC1. Scale bar = 10  $\mu$ m.

481 **Figure 4. Blocking TgMLC1 palmitoylation causes the protein to shift into the aqueous**  
482 **phase in Triton X-114.** WT, C8S, C11S, C(8,11)S and C(8,11)A parasites were extracted at  
483 4°C in Triton X-114 and the extracted proteins phase partitioned by shifting the temperature to  
484 20°C. The amounts of **(A)** TgMLC1 and **(B)** TgGRA8 recovered in the detergent (grey) and  
485 aqueous (black) phases from each sample were determined by quantitative western blotting (see  
486 Fig. S2 for a representative western blot), and are displayed here as the percentage of the total  
487 TgMLC1 recovered in the two phases combined. The data shown are the means and standard  
488 error of the mean (SEM) from 2 (C8S, C11S) or 4 (WT, C[8,11]S) independent replicates;  
489 C(8,11)A parasites were analyzed once.

490 **Figure 5. Blocking TgMLC1 palmitoylation alters the composition of the glideosome. (A)**  
491 Parasites expressing wild-type or mutant FLAG-tagged TgMLC1 were gently extracted in Triton  
492 X-100, and the soluble proteins (Input) were used for anti-FLAG immunoprecipitations (FLAG  
493 IP). Immunoprecipitated proteins were resolved by SDS-PAGE and analyzed by sequential  
494 western blotting with anti-TgMyoA, -TgGAP45, -TgMLC1 and -TgELC1; the fluorescent signal  
495 intensity of each immunoreactive band is indicated by the white number below the band (relative  
496 fluorescence units). Numbers on the left indicate molecular mass in kDa. **(B)** The signal  
497 intensities of TgGAP45, TgMyoA and TgELC1 immunoprecipitated from the C(8,11)S mutant  
498 parasite line is shown relative the corresponding band from the WT line, after normalizing to the  
499 amount of TgMLC1 recovered in each sample. Shown are the means and SEM from six  
500 independent experiments; differences were assessed using an unpaired two-tailed t-test.

501 **Figure 6. Mutations that block TgMLC1 palmitoylation and disrupt glideosome**  
502 **composition have little effect on parasite motility.** The upper panels show maximum intensity  
503 projections of the Hoechst 33342-stained WT or C[8,11]S parasites that moved within a 3-  
504 dimensional model extracellular matrix (Matrigel) during 60 sec of image capture. Scale bar = 50  
505  $\mu\text{m}$ . The table below shows the motility parameters calculated from three independent motility  
506 assays (each consisting of three technical replicates); numbers for each parameter represent the  
507 means +/- SEM. The total number of trajectories analyzed for each parasite line is also shown.  
508 Differences between WT and C(8,11)S parasites for each motility parameter were assessed using  
509 an unpaired two-tailed t-test and the resulting *p* values are shown in the righthand column.

510 **Figure 7. No changes in glideosome composition that could compensate for the loss of**  
511 **TgGAP45-TgMLC1 interaction are observed in C(8,11)S parasites.** Parasites were labeled  
512 for 24 hr in medium containing ( $^{35}\text{S}$ )- methionine/cysteine and gently extracted in Triton X-100.  
513 Soluble proteins were immunoprecipitated as described below, resolved by SDS-PAGE,  
514 transferred to a PVDF membrane and visualized by phosphorimaging (shown here). The same  
515 membrane was subsequently used for western blotting, probing with antibodies against  
516 TgMyoA, TgGAP45 and TgMLC1 (not shown) to determine which  $^{35}\text{S}$ -labeled bands  
517 corresponded to which glideosome proteins. Numbers on the left of each panel indicate  
518 molecular mass in kDa. (A) To test whether TgGAP45 interacts with any new proteins in  
519 C(8,11)S parasites,  $^{35}\text{S}$ -labeled proteins from WT and C(8,11)S parasites were  
520 immunoprecipitated with anti-TgGAP45, resolved by SDS/PAGE and visualized by  
521 phosphorimaging. No bands were detected in the pulldowns from C(8,11)S parasites that were  
522 not already present in the pulldowns from WT parasites. The band migrating immediately below  
523 TgGAP45 in the WT sample was recovered in some pulldowns but not others and may represent



524 a breakdown product of TgGAPA45 (see Fig. S7). **(B)** To test whether TgMyoA interacts with  
525 any new proteins in the C(8,11)S parasites, <sup>35</sup>S-labeled proteins immunoprecipitated using anti-  
526 Ty from WT-MyoATy and C(8,11)S-MyoATy parasites were compared. No bands were  
527 detected in the pulldowns from C(8,11)S parasites that were not already present in the pulldowns  
528 from WT parasites. **(C)** To test whether C(8,11)S TgMLC1 interacts with any new proteins  
529 compared to WT TgMLC1, <sup>35</sup>S-labeled proteins immunoprecipitated using anti-FLAG from WT  
530 and C(8,11)S parasites were compared. Asterisk indicates an ~80K band enriched in the FLAG  
531 pulldown of C(8,11)S compared to WT; this protein was shown to be a fragment of TgMyoA  
532 (see text). The relative amounts of TgMyoA and TgGAP45 pulled down in Panel C were  
533 quantified by western blotting as shown in Fig. S6.

534 **Table 1: Strains generated and used in this study, with their relevant genotypes**

## 535 **Supplementary figure legends and tables**

536 **Figure S1. Generation and characterization of TgMLC1 knock-in parasites.** **(A)** Allelic  
537 replacement strategy. The *TgMLC1* allele was targeted in *RHΔku80* parasites using 5' and 3'  
538 *TgMLC1* homology regions flanking a construct that consisted of cDNA encoding full-length  
539 TgMLC1 (wildtype or mutant) with an N-terminal FLAG tag, the 3' untranslated region (UTR)  
540 from *DHFR*, and a selection cassette consisting of the *GRA1* promoter, the phleomycin  
541 resistance gene (*ble*) and the 3' UTR from *SAG1*. The binding location of PCR primers P1-P4  
542 (which correspond to Primers 25-28, respectively, in Supplementary Table 11) and the  
543 corresponding expected amplicon sizes are indicated in red. This same strategy was used to  
544 generate all TgMLC1 knock-in lines. Panels B-D illustrate how insertion at the genomic locus  
545 and correct localization and expression of the mutant protein was confirmed in each knock-in

546 line; results for the C(8,11)S parasite line are shown here. **(B)** PCR results using primer pairs  
547 P1+P2 and P3+P4 on parental (*Δku80*) and C(8,11)S parasites after allelic replacement. DNA  
548 ladder is shown in the leftmost lane, numbers indicate base pairs. **(C)** Immunofluorescence  
549 staining of C(8,11)S parasites with anti-GAP45 (red) and anti-FLAG (green) confirms  
550 expression and proper (peripheral) localization of the FLAG-tagged TgMLC1. Scale bar = 10  
551 μm. **(D)** Western blot of C(8,11)S parasites stained with anti TgMyoA (green) and anti-FLAG  
552 (red) confirms expression and proper size of the FLAG-tagged protein. Numbers on the left  
553 indicate molecular mass in kDa. Successful allelic replacement by constructs expressing WT,  
554 C8S, C11S and C8A11A TgMLC1 were similarly confirmed by PCR, immunofluorescence and  
555 western blot.

556 **Figure S2. Triton X-114 phase partitioning of parasites expressing WT vs. palmitoylation-**  
557 **deficient TgMLC1.** WT, C8S, C11S and C8SC11S parasites were extracted at 4°C in Triton X-  
558 114 and subjected to phase partitioning at 20°C. Proteins present in the lysate before partitioning  
559 (Whole lysate) and in the aqueous and detergent phases after partitioning were resolved by SDS-  
560 PAGE and visualized either by **(A)** Western blotting with anti-TgMLC1 (green) and anti-  
561 TgGRA8 (red), or **(B)** Colloidal Coomassie staining. Numbers on the left of each panel indicate  
562 molecular mass in kDa.

563 **Figure S3. Similar changes in the composition of the glideosome are observed in C(8,11)S**  
564 **and C(8,11)A parasites.** **(A)** Parasites expressing wild-type or mutant FLAG-tagged TgMLC1  
565 were gently extracted in Triton X-100, and the soluble proteins (Input) used for anti-FLAG  
566 immunoprecipitations. Proteins that bound to the anti-FLAG affinity resin and those that did not  
567 (Bound, Unbound) were recovered and analyzed by SDS-PAGE and sequential western blotting

568 with anti-TgMyoA, -TgGAP45, -TgMLC1 and -TgELC1. The signal intensity of each  
569 immunoreactive band was quantified (white number below the band; relative fluorescence units).  
570 Numbers on the left indicate molecular mass in kDa. **(B)** The signal intensities of TgGAP45,  
571 TgMyoA and TgELC1 pulled down from each of the parasite lines is shown relative the  
572 corresponding band from WT parasites, after normalizing to the amount of TgMLC1 recovered  
573 in each sample. Shown are the means and SEM from three independent experiments; data were  
574 analyzed using one-way ANOVA.

575 **Figure S4. WT, C(8,11)S and C(8,11)A parasites express equivalent amounts of both**  
576 **FLAG-tagged TgMLC1 and TgMyoA.** Parasite proteins were extracted in boiling SDS-PAGE  
577 sample buffer, resolved by SDS-PAGE and visualized by western blotting with anti-TgMyoA  
578 and anti-TgMLC1 (left panel) or anti-TgIMC1 (right panel) as a loading control. The signal  
579 intensity of each immunoreactive band was quantified (white number below the band; relative  
580 fluorescence units). Numbers on the left indicate molecular mass in kDa. **(B)** The signal  
581 intensities of TgMyoA and TgMLC1 in each of the parasite lines is shown relative the  
582 corresponding band from wildtype parasites, after normalizing to the amount of TgIMC1 in each  
583 sample.

584 **Figure S5. Generation and characterization of parasites expressing C-terminally Ty-tagged**  
585 **TgMyoA.** **(A)** Schematic representation of the *TgMyoA* locus after the insertion of Ty tag at the  
586 3' end using CRISPR-Cas9. The binding location of PCR primers P1-P3 and the expected  
587 amplicon sizes are indicated. Primers P1, P2 and P3 correspond to primers 20, 22 and 21,  
588 respectively, in Supplementary Table 11. **(B)** PCR results using primer pairs P1+P2 and P1+P3  
589 on parental parasites (*Δku80*) and the WT and C(8,11)S lines after Ty tagging the *TgMyoA* locus.

590 DNA ladder is shown in the leftmost lane, numbers indicate base pairs. **(C)** Immunofluorescence  
591 staining of WT-MyoATy and C(8,11)S-MyoATy parasites with anti-Ty (red) and anti-GAP45  
592 (green) confirms expression and proper localization of Ty-tagged TgMyoA in the two lines.  
593 Scale bar = 10  $\mu$ m. **(D)** Western blots of WT-MyoATy and C(8,11)S-MyoATy parasites probed  
594 with anti-Ty (red) followed by anti-TgMyoA and TgMLC1 (green) confirms similar expression  
595 levels of TgMyoA in the two lines. Numbers on the left indicate molecular mass in kDa.

596 **Figure S6:** The western blot signal intensities of **(A)** TgMyoA and **(B)** TgGAP45 pulled down  
597 from WT or C(8,11)S parasites in Fig. 7C, after normalizing for the amount of TgMLC1  
598 recovered in each sample. Shown are the means and SEM from two independent experiments;  
599 differences were assessed using an unpaired two-tailed t-test.

600 **Figure S7. Preparative SDS-PAGE of anti-FLAG immunoprecipitated proteins from WT**  
601 **and C(8,11)S parasites.** Proteins immunoprecipitated using anti-FLAG from WT and C(8,11)S  
602 parasites were resolved by SDS-PAGE and stained with colloidal Coomassie Blue. The major  
603 stained bands were excised, digested with trypsin and identified by LC/MS-MS as described in  
604 Materials and Methods. Numbers on the left indicate molecular mass in kDa. Labels on the right  
605 indicate the major protein identified in the band and the LC/MS-MS data file on which this  
606 identification was based (see Table S1 for a summary of the LC/MS-MS results and Tables S2-  
607 S10 for the raw data for each band).

608 **Supplementary Tables 1-10: Identification of protein bands recovered in the anti-FLAG**  
609 **immunoprecipitates from WT and C(8,11)S parasites.** Protein identification data for the nine  
610 excised bands shown in Fig. S6 are summarized in Table S1, and the raw LC/MS-MS results for  
611 each individual band are provided in Tables S2-S10.

612 **Supplementary Table 11. List of oligonucleotides used in this study**

613 **Acknowledgements**

614 This work was supported by US Public Health Service grants AI139201 to GEW and GM111703  
615 to MB. The Vermont Genetics Network Proteomics Facility is supported through NIH grant  
616 P20GM103449 from the INBRE Program of the National Institute of General Medical Sciences.  
617 The funders had no role in study design, data collection and interpretation, or the decision to  
618 submit the work for publication.

619 **References**

- 620 1. Montoya JG, Liesenfeld O. 2004. Toxoplasmosis. *Lancet* 363:1965-76.
- 621 2. Barragan A, Sibley LD. 2002. Transepithelial migration of *Toxoplasma gondii* is linked to  
622 parasite motility and virulence. *J Exp Med* 195:1625-33.
- 623 3. Harker KS, Ueno N, Lodoen MB. 2015. *Toxoplasma gondii* Dissemination: A Parasite's  
624 Journey through the Infected Host. *Parasite Immunol* 37:141-149.
- 625 4. Sibley LD. 2004. Intracellular parasite invasion strategies. *Science* 304:248-53.
- 626 5. Heintzelman MB, Schwartzman JD. 1997. A novel class of unconventional myosins from  
627 *Toxoplasma gondii*. *J Mol Biol* 271:139-46.
- 628 6. Pinder JC, Fowler RE, Dluzewski AR, Bannister LH, Lavin FM, Mitchell GH, Wilson RJ,  
629 Gratzner WB. 1998. Actomyosin motor in the merozoite of the malaria parasite, *Plasmodium*  
630 *falciparum*: implications for red cell invasion. *J Cell Sci* 111 ( Pt 13):1831-9.
- 631 7. Herm-Gotz A, Weiss S, Stratmann R, Fujita-Becker S, Ruff C, Meyhofer E, Soldati T,  
632 Manstein DJ, Geeves MA, Soldati D. 2002. *Toxoplasma gondii* myosin A and its light chain:  
633 a fast, single-headed, plus-end-directed motor. *EMBO J* 21:2149-58.
- 634 8. Baum J, Richard D, Healer J, Rug M, Krnajski Z, Gilberger TW, Green JL, Holder AA,  
635 Cowman AF. 2006. A conserved molecular motor drives cell invasion and gliding motility  
636 across malaria life cycle stages and other apicomplexan parasites. *J Biol Chem* 281:5197-208.

- 637 9. Nebl T, Prieto JH, Kapp E, Smith BJ, Williams MJ, Yates JR, 3rd, Cowman AF, Tonkin CJ.  
638 2011. Quantitative in vivo analyses reveal calcium-dependent phosphorylation sites and  
639 identifies a novel component of the *Toxoplasma* invasion motor complex. *PLoS Pathog*  
640 7:e1002222.
- 641 10. Bookwalter CS, Kelsen A, Leung JM, Ward GE, Trybus KM. 2014. A *Toxoplasma gondii*  
642 class XIV myosin, expressed in Sf9 cells with a parasite co-chaperone, requires two light  
643 chains for fast motility. *J Biol Chem* 289:30832-41.
- 644 11. Williams MJ, Alonso H, Enciso M, Egarter S, Sheiner L, Meissner M, Striepen B, Smith BJ,  
645 Tonkin CJ. 2015. Two Essential Light Chains Regulate the MyoA Lever Arm To Promote  
646 *Toxoplasma* Gliding Motility. *MBio* 6:e00845-15.
- 647 12. Green JL, Wall RJ, Vahokoski J, Yusuf NA, Ridzuan MAM, Stanway RR, Stock J, Knuepfer  
648 E, Brady D, Martin SR, Howell SA, Pires IP, Moon RW, Molloy JE, Kursula I, Tewari R,  
649 Holder AA. 2017. Compositional and expression analyses of the glideosome during the  
650 Plasmodium life cycle reveal an additional myosin light chain required for maximum motility.  
651 *J Biol Chem* 292:17857-17875.
- 652 13. Powell CJ, Jenkins ML, Parker ML, Ramaswamy R, Kelsen A, Warshaw DM, Ward GE,  
653 Burke JE, Boulanger MJ. 2017. Dissecting the molecular assembly of the *Toxoplasma gondii*  
654 MyoA motility complex. *J Biol Chem* 292:19469-19477.
- 655 14. Powell CJ, Ramaswamy R, Kelsen A, Hamelin DJ, Warshaw DM, Bosch J, Burke JE, Ward  
656 GE, Boulanger MJ. 2018. Structural and mechanistic insights into the function of the  
657 unconventional class XIV myosin MyoA from *Toxoplasma gondii*. *Proc Natl Acad Sci U S A*  
658 115:E10548-e10555.
- 659 15. Robert-Paganin J, Robblee JP, Auguin D, Blake TCA, Bookwalter CS, Krementsova EB,  
660 Moussaoui D, Previs MJ, Jousset G, Baum J, Trybus KM, Houdusse A. 2019. Plasmodium  
661 myosin A drives parasite invasion by an atypical force generating mechanism. *Nat Commun*  
662 10:3286.
- 663 16. Frenal K, Dubremetz JF, Lebrun M, Soldati-Favre D. 2017. Gliding motility powers invasion  
664 and egress in Apicomplexa. *Nat Rev Microbiol* 15:645-660.

- 665 17. Gaskins E, Gilk S, DeVore N, Mann T, Ward G, Beckers C. 2004. Identification of the  
666 membrane receptor of a class XIV myosin in *Toxoplasma gondii*. *J Cell Biol* 165:383-93.
- 667 18. Johnson TM, Rajfur Z, Jacobson K, Beckers CJ. 2007. Immobilization of the Type XIV  
668 Myosin Complex in *Toxoplasma gondii*. *Mol Biol Cell* 18:3039-3046.
- 669 19. Jacot D, Tosetti N, Pires I, Stock J, Graindorge A, Hung YF, Han H, Tewari R, Kursula I,  
670 Soldati-Favre D. 2016. An Apicomplexan Actin-Binding Protein Serves as a Connector and  
671 Lipid Sensor to Coordinate Motility and Invasion. *Cell Host Microbe* 20:731-743.
- 672 20. Pazicky S, Dhamotharan K, Kaszuba K, Mertens H, Gilberger T, Svergun D, Kosinski J,  
673 Weininger U, Löw C. 2019. Structural role of essential light chains in the apicomplexan  
674 glideosome. *bioRxiv* doi:10.1101/867499:867499.
- 675 21. Warshaw DM. 2004. Lever arms and necks: a common mechanistic theme across the myosin  
676 superfamily. *J Muscle Res Cell Motil* 25:467-74.
- 677 22. Bergman LW, Kaiser K, Fujioka H, Coppens I, Daly TM, Fox S, Matuschewski K,  
678 Nussenzweig V, Kappe SH. 2003. Myosin A tail domain interacting protein (MTIP) localizes  
679 to the inner membrane complex of *Plasmodium* sporozoites. *J Cell Sci* 116:39-49.
- 680 23. Frenal K, Polonais V, Marq JB, Stratmann R, Limenitakis J, Soldati-Favre D. 2010. Functional  
681 dissection of the apicomplexan glideosome molecular architecture. *Cell Host Microbe* 8:343-  
682 57.
- 683 24. Egarter S, Andenmatten N, Jackson AJ, Whitelaw JA, Pall G, Black JA, Ferguson DJ, Tardieux  
684 I, Mogilner A, Meissner M. 2014. The toxoplasma Acto-MyoA motor complex is important  
685 but not essential for gliding motility and host cell invasion. *PLoS One* 9:e91819.
- 686 25. Whitelaw JA, Latorre-Barragan F, Gras S, Pall GS, Leung JM, Heaslip A, Egarter S,  
687 Andenmatten N, Nelson SR, Warshaw DM, Ward GE, Meissner M. 2017. Surface attachment,  
688 promoted by the actomyosin system of *Toxoplasma gondii* is important for efficient gliding  
689 motility and invasion. *BMC Biol* 15:1.
- 690 26. Andenmatten N, Egarter S, Jackson AJ, Jullien N, Herman JP, Meissner M. 2013. Conditional  
691 genome engineering in *Toxoplasma gondii* uncovers alternative invasion mechanisms. *Nat*  
692 *Methods* 10:125-7.

- 693 27. Meissner M, Ferguson DJ, Frischknecht F. 2013. Invasion factors of apicomplexan parasites:  
694 essential or redundant? *Curr Opin Microbiol* 16:438-44.
- 695 28. Pavlou G, Touquet B, Vigetti L, Renesto P, Bougdour A, Debarre D, Balland M, Tardieux I.  
696 2020. Coupling Polar Adhesion with Traction, Spring and Torque Forces Allows High Speed  
697 Helical Migration of the Protozoan Parasite *Toxoplasma*. *ACS Nano* 14:7121-7139.
- 698 29. Tardieux I, Baum J. 2016. Reassessing the mechanics of parasite motility and host-cell  
699 invasion. *J Cell Biol* 214:507-15.
- 700 30. Bane KS, Lepper S, Kehrer J, Sattler JM, Singer M, Reinig M, Klug D, Heiss K, Baum J,  
701 Mueller AK, Frischknecht F. 2016. The Actin Filament-Binding Protein Coronin Regulates  
702 Motility in *Plasmodium* Sporozoites. *PLoS Pathog* 12:e1005710.
- 703 31. Kappe S, Bruderer T, Gantt S, Fujioka H, Nussenzweig V, Menard R. 1999. Conservation of  
704 a gliding motility and cell invasion machinery in apicomplexan parasites. *J Cell Biol* 147:937-  
705 44.
- 706 32. Munter S, Sabass B, Selhuber-Unkel C, Kudryashev M, Hegge S, Engel U, Spatz JP,  
707 Matuschewski K, Schwarz US, Frischknecht F. 2009. *Plasmodium* sporozoite motility is  
708 modulated by the turnover of discrete adhesion sites. *Cell Host Microbe* 6:551-62.
- 709 33. Quadt KA, Streichfuss M, Moreau CA, Spatz JP, Frischknecht F. 2016. Coupling of  
710 Retrograde Flow to Force Production During Malaria Parasite Migration. *ACS Nano* 10:2091-  
711 102.
- 712 34. Carey KL, Westwood NJ, Mitchison TJ, Ward GE. 2004. A small-molecule approach to  
713 studying invasive mechanisms of *Toxoplasma gondii*. *Proc Natl Acad Sci U S A* 101:7433-8.
- 714 35. Farrell A, Thirugnanam S, Lorestani A, Dvorin JD, Eidell KP, Ferguson DJ, Anderson-White  
715 BR, Duraisingh MT, Marth GT, Gubbels MJ. 2012. A DOC2 protein identified by mutational  
716 profiling is essential for apicomplexan parasite exocytosis. *Science* 335:218-21.
- 717 36. Hegge S, Münter S, Steinbüchel M, Heiss K, Engel U, Matuschewski K, Frischknecht F. 2010.  
718 Multistep adhesion of *Plasmodium* sporozoites. *Faseb J* 24:2222-34.
- 719 37. Drewry LL, Sibley LD. 2015. *Toxoplasma* Actin Is Required for Efficient Host Cell Invasion.  
720 *MBio* 6:e00557.



- 721 38. Linder ME, Deschenes RJ. 2007. Palmitoylation: policing protein stability and traffic. *Nat Rev*  
722 *Mol Cell Biol* 8:74-84.
- 723 39. Tom CT, Martin BR. 2013. Fat chance! Getting a grip on a slippery modification. *ACS Chem*  
724 *Biol* 8:46-57.
- 725 40. Linder ME, Deschenes RJ. 2003. New insights into the mechanisms of protein palmitoylation.  
726 *Biochemistry* 42:4311-20.
- 727 41. Salaun C, Greaves J, Chamberlain LH. 2010. The intracellular dynamic of protein  
728 palmitoylation. *J Cell Biol* 191:1229-38.
- 729 42. Resh MD. 2006. Palmitoylation of ligands, receptors, and intracellular signaling molecules.  
730 *Sci STKE* 2006:re14.
- 731 43. Beck JR, Fung C, Straub KW, Coppens I, Vashisht AA, Wohlschlegel JA, Bradley PJ. 2013.  
732 A *Toxoplasma* palmitoyl acyl transferase and the palmitoylated armadillo repeat protein  
733 TgARO govern apical rhoptry tethering and reveal a critical role for the rhoptries in host cell  
734 invasion but not egress. *PLoS Pathog* 9:e1003162.
- 735 44. Caballero MC, Alonso AM, Deng B, Attias M, de Souza W, Corvi MM. 2016. Identification  
736 of new palmitoylated proteins in *Toxoplasma gondii*. *Biochim Biophys Acta* 1864:400-8.
- 737 45. Child MA, Hall CI, Beck JR, Ofori LO, Albrow VE, Garland M, Bowyer PW, Bradley PJ,  
738 Powers JC, Boothroyd JC, Weerapana E, Bogyo M. 2013. Small-molecule inhibition of a  
739 depalmitoylase enhances *Toxoplasma* host-cell invasion. *Nat Chem Biol* 9:651-6.
- 740 46. Corvi MM, Turowski VR. 2019. Palmitoylation in apicomplexan parasites: from established  
741 regulatory roles to putative new functions. *Mol Biochem Parasitol* 230:16-23.
- 742 47. De Napoli MG, de Miguel N, Lebrun M, Moreno SN, Angel SO, Corvi MM. 2013. N-terminal  
743 palmitoylation is required for *Toxoplasma gondii* HSP20 inner membrane complex  
744 localization. *Biochim Biophys Acta* 1833:1329-37.
- 745 48. Frenal K, Kemp LE, Soldati-Favre D. 2014. Emerging roles for protein S-palmitoylation in  
746 *Toxoplasma* biology. *Int J Parasitol* 44:121-31.

- 747 49. Fung C, Beck JR, Robertson SD, Gubbels MJ, Bradley PJ. 2012. *Toxoplasma* ISP4 is a central  
748 IMC Sub-compartment Protein whose localization depends on palmitoylation but not  
749 myristoylation. *Mol Biochem Parasitol* 184:99-108.
- 750 50. Hopp CS, Balaban AE, Bushell ES, Billker O, Rayner JC, Sinnis P. 2016. Palmitoyl  
751 transferases have critical roles in the development of mosquito and liver stages of *Plasmodium*.  
752 *Cell Microbiol* 18:1625-1641.
- 753 51. Jones ML, Collins MO, Goulding D, Choudhary JS, Rayner JC. 2012. Analysis of protein  
754 palmitoylation reveals a pervasive role in Plasmodium development and pathogenesis. *Cell*  
755 *Host Microbe* 12:246-58.
- 756 52. Tremp AZ, Al-Khattaf FS, Dessens JT. 2017. Palmitoylation of *Plasmodium* alveolins  
757 promotes cytoskeletal function. *Mol Biochem Parasitol* 213:16-21.
- 758 53. Wetzel J, Herrmann S, Swapna LS, Prusty D, Peter AT, Kono M, Saini S, Nellimarla S, Wong  
759 TW, Wilcke L, Ramsay O, Cabrera A, Biller L, Heincke D, Mossman K, Spielmann T,  
760 Ungermann C, Parkinson J, Gilberger TW. 2014. The role of palmitoylation for protein  
761 recruitment to the inner membrane complex of the malaria parasite. *J Biol Chem* 290:1712-28.
- 762 54. Foe IT, Child MA, Majmudar JD, Krishnamurthy S, van der Linden WA, Ward GE, Martin  
763 BR, Bogyo M. 2015. Global Analysis of Palmitoylated Proteins in *Toxoplasma gondii*. *Cell*  
764 *Host Microbe* 18:501-11.
- 765 55. Leung JM, Tran F, Pathak RB, Poupart S, Heaslip AT, Ballif BA, Westwood NJ, Ward GE.  
766 2014. Identification of *T. gondii* myosin light chain-1 as a direct target of TachypleginA-2, a  
767 small-molecule inhibitor of parasite motility and invasion. *PLoS One* 9:e98056.
- 768 56. Bordier C. 1981. Phase separation of integral membrane proteins in Triton X-114 solution. *J*  
769 *Biol Chem* 256:1604-7.
- 770 57. Wichroski MJ, Ward GE. 2003. Biosynthesis of glycosylphosphatidylinositol is essential to  
771 the survival of the protozoan parasite *Toxoplasma gondii*. *Eukaryot Cell* 2:1132-6.
- 772 58. Carey KL, Donahue CG, Ward GE. 2000. Identification and molecular characterization of  
773 GRA8, a novel, proline-rich, dense granule protein of *Toxoplasma gondii*. *Mol Biochem*  
774 *Parasitol* 105:25-37.

- 775 59. Frenal K, Marq JB, Jacot D, Polonais V, Soldati-Favre D. 2014. Plasticity between MyoC- and  
776 MyoA-glideosomes: an example of functional compensation in *Toxoplasma gondii* invasion.  
777 PLoS Pathog 10:e1004504.
- 778 60. Rees-Channer RR, Martin SR, Green JL, Bowyer PW, Grainger M, Molloy JE, Holder AA.  
779 2006. Dual acylation of the 45 kDa gliding-associated protein (GAP45) in *Plasmodium*  
780 *falciparum* merozoites. Mol Biochem Parasitol 149:113-6.
- 781 61. Frenal K, Tay CL, Mueller C, Bushell ES, Jia Y, Graindorge A, Billker O, Rayner JC, Soldati-  
782 Favre D. 2013. Global analysis of apicomplexan protein S-acyl transferases reveals an enzyme  
783 essential for invasion. Traffic 14:895-911.
- 784 62. Dogga SK, Frenal K. 2020. Two palmitoyl acyltransferases involved sequentially in the  
785 biogenesis of the inner membrane complex of *Toxoplasma gondii*. Cell Microbiol April  
786 23:e13212.
- 787 63. Thomas GM, Hayashi T, Chiu SL, Chen CM, Hujanir RL. 2012. Palmitoylation by DHHC5/8  
788 targets GRIP1 to dendritic endosomes to regulate AMPA-R trafficking. Neuron 73:482-96.
- 789 64. Alonso AM, Coceres VM, De Napoli MG, Nieto Guil AF, Angel SO, Corvi MM. 2012. Protein  
790 palmitoylation inhibition by 2-bromopalmitate alters gliding, host cell invasion and parasite  
791 morphology in *Toxoplasma gondii*. Mol Biochem Parasitol 184:39-43.
- 792 65. Roos DS. 1996. Molecular genetic tools for the identification and analysis of drug targets in  
793 *Toxoplasma gondii*. Curr Top Microbiol Immunol 219:247-59.
- 794 66. Sidik SM, Hackett CG, Tran F, Westwood NJ, Lourido S. 2014. Efficient genome engineering  
795 of *Toxoplasma gondii* using CRISPR/Cas9. PLoS One 9:e100450.
- 796 67. Tang Q, Andenmatten N, Hortua Triana MA, Deng B, Meissner M, Moreno SNJ, Ballif BA,  
797 Ward GE. 2014. Calcium-dependent phosphorylation alters Class XIVa myosin function in the  
798 protozoan parasite *Toxoplasma gondii*. Mol Biol Cell 25:2579-2791.
- 799 68. Leung JM, Rould MA, Konradt C, Hunter CA, Ward GE. 2014. Disruption of TgPHIL1 alters  
800 specific parameters of *Toxoplasma gondii* motility measured in a quantitative, three-  
801 dimensional live motility assay. PLoS One 9:e85763.

802 69. Krishnamurthy S, Deng B, Del Rio R, Buchholz KR, Treeck M, Urban S, Boothroyd J, Lam  
803 YW, Ward GE. 2016. Not a Simple Tether: Binding of *Toxoplasma gondii* AMA1 to RON2  
804 during Invasion Protects AMA1 from Rhomboid-Mediated Cleavage and Leads to  
805 Dephosphorylation of Its Cytosolic Tail. *MBio* 7:e00754-16.

806

Figure 1

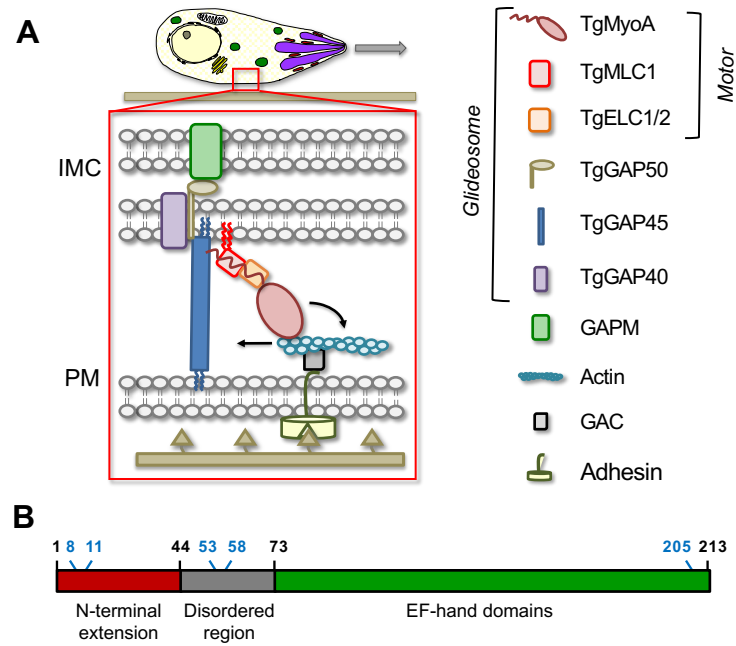

Figure 2

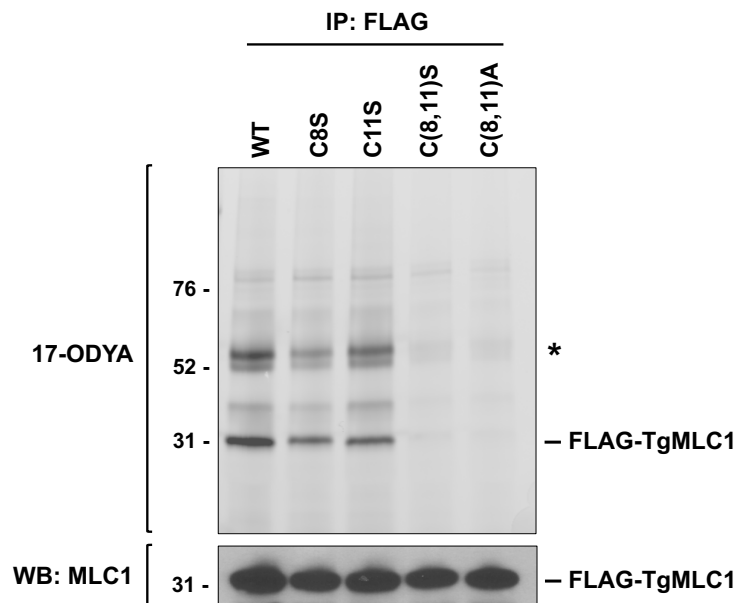

Figure 3

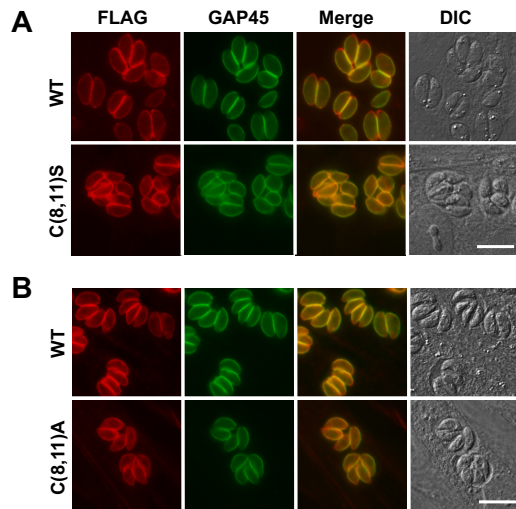

Figure 4

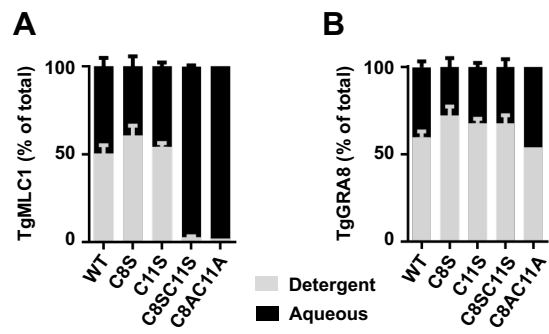

Figure 5

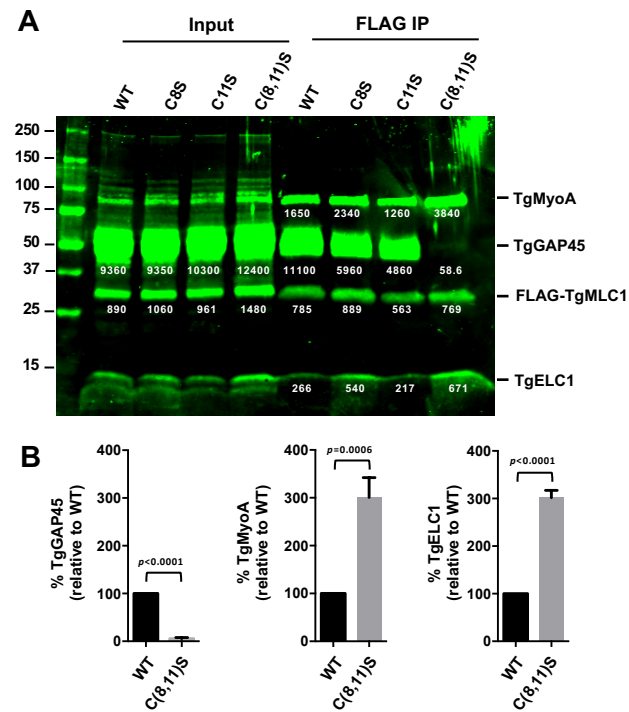

Figure 6

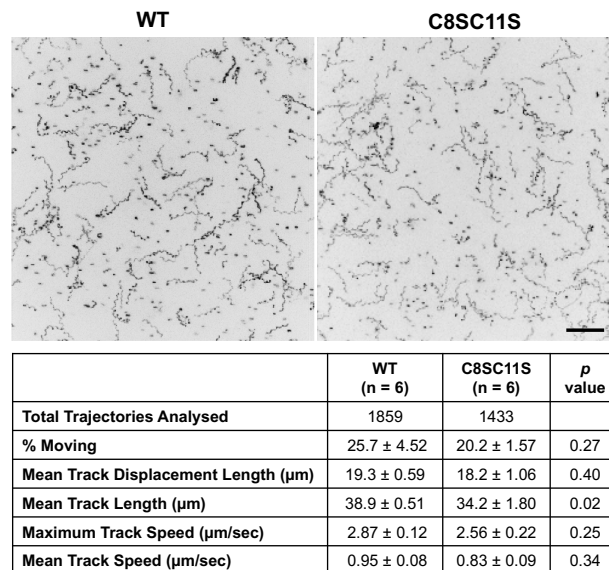

Figure 7

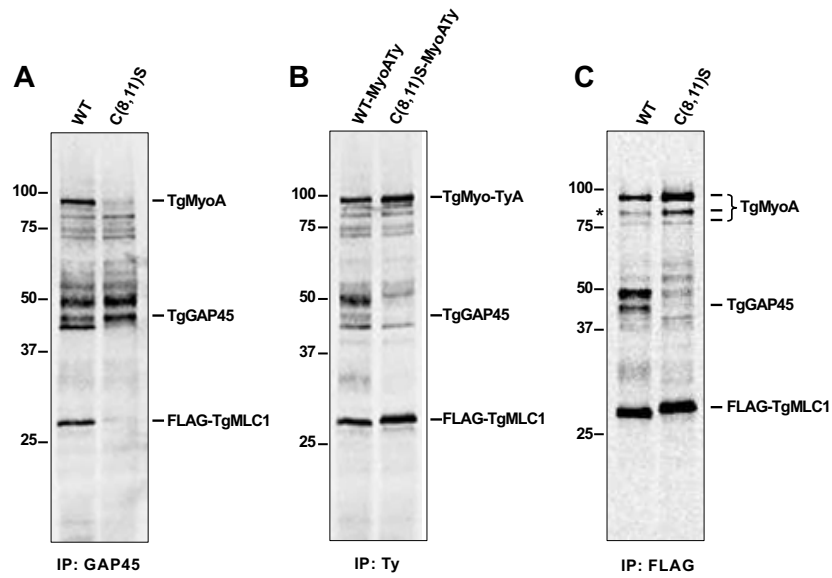

Table 1: Parasite strains used in this study

| Strain designation | Relevant genotype                                              |
|--------------------|----------------------------------------------------------------|
| WT                 | <i>RHΔku80Δmlc1::Flag-MLC1</i>                                 |
| C8S                | <i>RHΔku80Δmlc1::Flag-MLC1<sup>C8S</sup></i>                   |
| C11S               | <i>RHΔku80Δmlc1::Flag-MLC1<sup>C11S</sup></i>                  |
| C(8,11)S           | <i>RHΔku80Δmlc1::Flag-MLC1<sup>C8SC11S</sup></i>               |
| C(8,11)A           | <i>RHΔku80Δmlc1::Flag-MLC1<sup>C8AC11A</sup></i>               |
| WT-MyoATy          | <i>RHΔku80Δmlc1::Flag-MLC1ΔmyoA::MYOA-Ty</i>                   |
| C(8,11)S-MyoATy    | <i>RHΔku80Δmlc1::Flag-MLC1<sup>C8SC11S</sup>ΔmyoA::MYOA-Ty</i> |



Figure S1

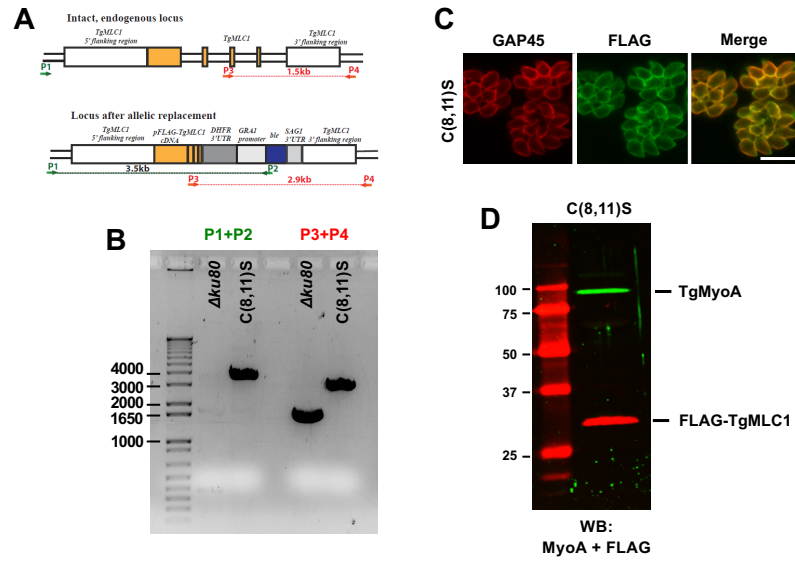

Figure S2

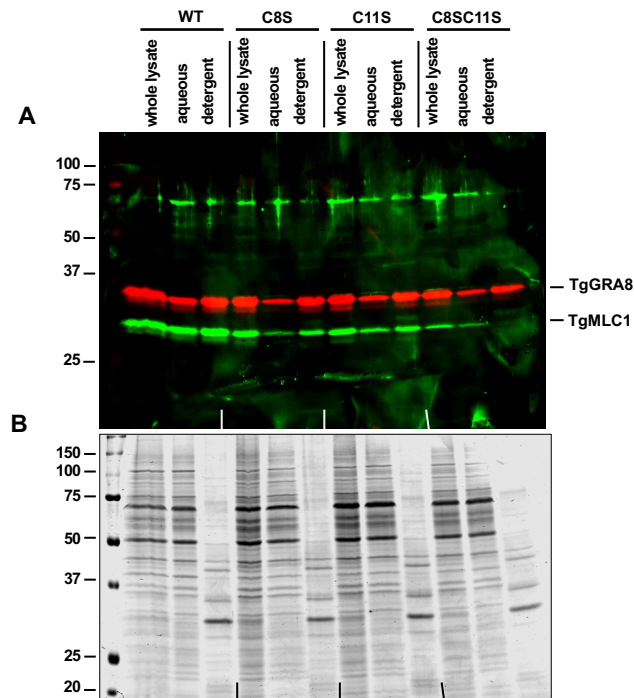

Figure S3

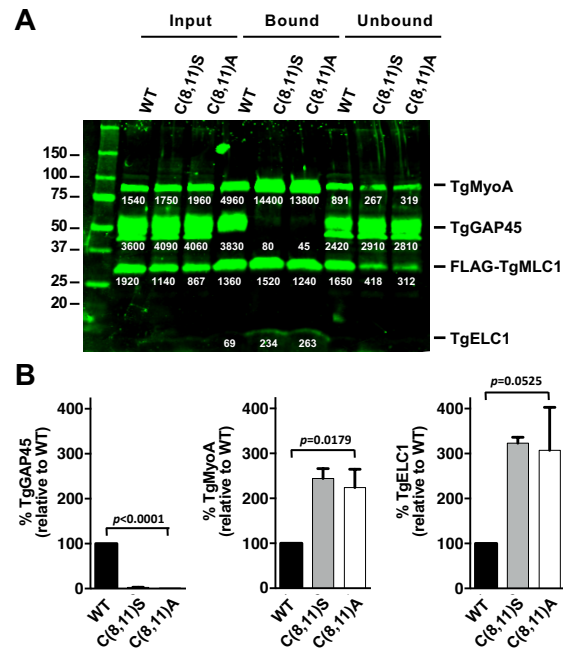

Figure S4

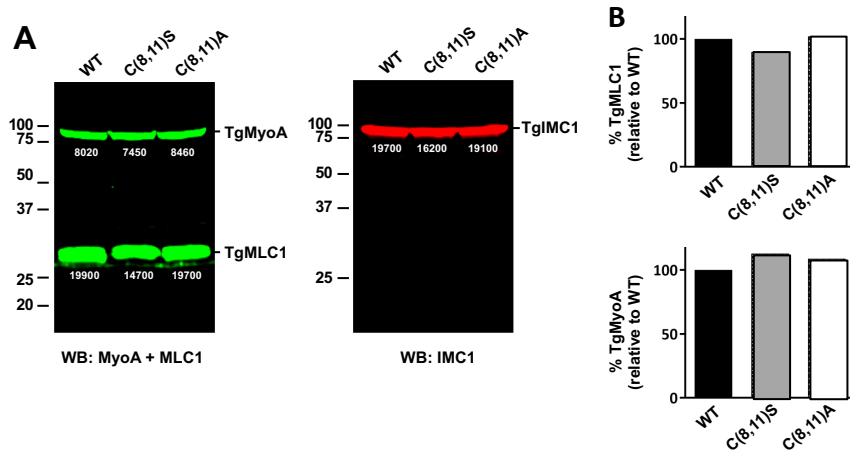

Figure S5

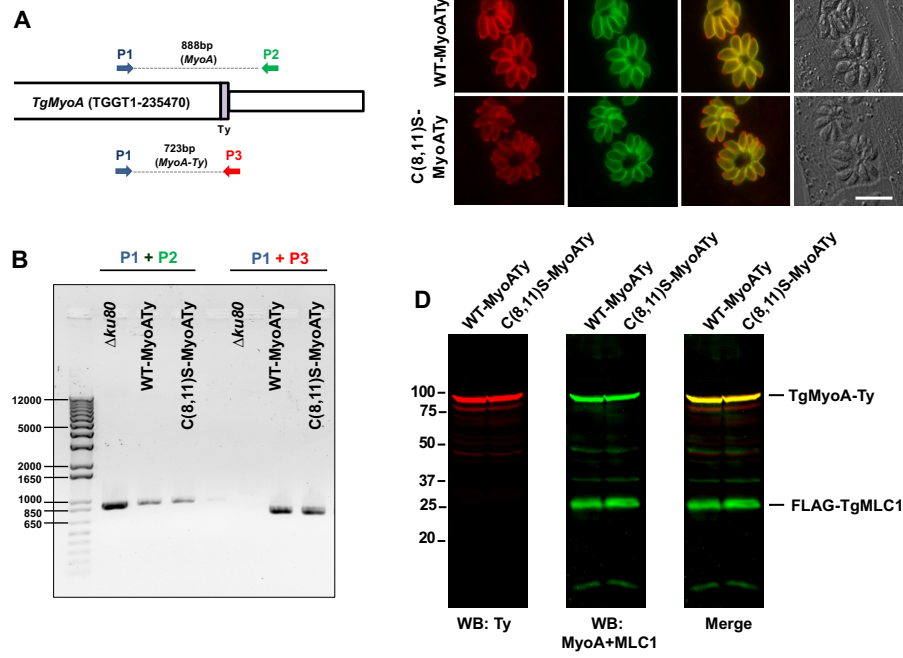

Figure S6

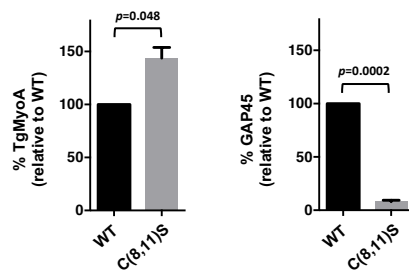

Figure S7

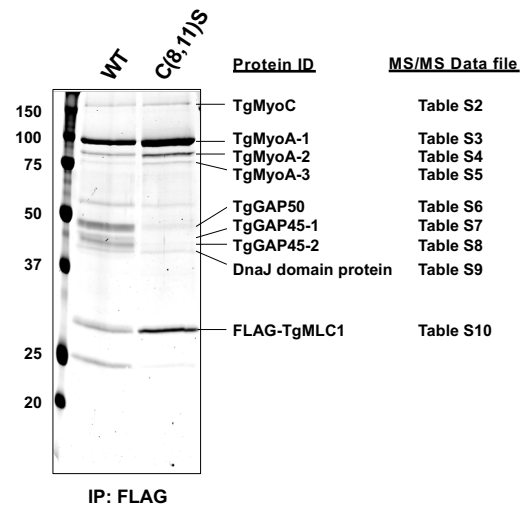

Table S1

| Protein name        | ToxoDB<br>Accession no. | Score | Sequence<br>Coverage | Unique<br>Peptides | Total spectra<br>(#PSMs) |
|---------------------|-------------------------|-------|----------------------|--------------------|--------------------------|
| TgMyoC              | TGME49_255190           | 102.7 | 23.06                | 27                 | 36                       |
| TgMyoA-1            | TGME49_235470           | 529.7 | 71.36                | 63                 | 180                      |
| TgMyoA-2            | TGME49_235470           | 231.7 | 58.97                | 43                 | 81                       |
| TgMyoA-3            | TGME49_235470           | 90.4  | 32.37                | 22                 | 32                       |
| TgGAP50             | TGME49_219320           | 98.9  | 34.57                | 13                 | 28                       |
| TgGAP45-1           | TGME49_223940           | 161.2 | 52.24                | 15                 | 55                       |
| TgGAP45-2           | TGME49_223940           | 255.4 | 54.69                | 16                 | 81                       |
| DnaJ domain protein | TGME49_267430           | 47.7  | 25.41                | 11                 | 20                       |
| TgMLC1              | TGME49_257680           | 124.6 | 81.22                | 10                 | 43                       |











TABLE S6

| Accession     | Description                                                          | Score                    | Coverage   | # Proteins       | # Unique Peptides        | # Peptides                       | # PSMs | # AAs | MW [kDa]    | calc. pt |            |          |          |                    |
|---------------|----------------------------------------------------------------------|--------------------------|------------|------------------|--------------------------|----------------------------------|--------|-------|-------------|----------|------------|----------|----------|--------------------|
| TGME49_219320 | organism=Toxoplasma_gondii_ME49   product=acid phosphatase GAP50     | 98.93                    | 34.57      | 1                | 13                       | 13                               | 28     | 431   | 46.6        | 6.95     |            |          |          |                    |
|               | A2                                                                   |                          |            |                  |                          |                                  |        |       |             |          |            |          |          |                    |
|               | Sequence                                                             | # PSMs                   | # Proteins | # Protein Groups | Protein Group Accessions | Modifications                    | ΔCn    | XCorr | Probability | Charge   | MH+ [Da]   | ΔM [ppm] | RT [min] | # Missed Cleavages |
|               | High                                                                 | HSLSYYAGETGcLFELTAEGLYTR | 2          | 1                | 1.TGME49_219320          | C14(Carbamidomethyl)             | 0.0000 | 7.22  | 0.00        | 3        | 2878.37693 | 1.81     | 36.60    | 0                  |
|               | High                                                                 | LAPADATEAAEAENHGYPK      | 4          | 1                | 1.TGME49_219320          |                                  | 0.0000 | 4.49  | 0.00        | 4        | 1896.90981 | 0.57     | 31.00    | 0                  |
|               | High                                                                 | GDsmLQYYLQPLK            | 2          | 1                | 1.TGME49_219320          | M4(Oxidation)                    | 0.0000 | 4.30  | 0.00        | 2        | 1684.86162 | 0.06     | 35.45    | 0                  |
|               | High                                                                 | KSIDAFNFVSQLPEVR         | 2          | 1                | 1.TGME49_219320          |                                  | 0.0000 | 4.01  | 0.00        | 3        | 1849.98282 | 1.11     | 35.03    | 1                  |
|               | High                                                                 | SIDAFNFVSQLPEVR          | 4          | 1                | 1.TGME49_219320          |                                  | 0.0000 | 3.98  | 0.00        | 2        | 1721.88408 | -0.99    | 35.89    | 0                  |
|               | High                                                                 | TELYAVTSEQKDGK           | 1          | 1                | 1.TGME49_219320          |                                  | 0.0000 | 3.80  | 0.00        | 3        | 1782.91330 | 0.70     | 31.61    | 1                  |
|               | High                                                                 | LVSSTTGETLYTHKQPLK       | 2          | 1                | 1.TGME49_219320          |                                  | 0.0000 | 3.58  | 0.00        | 4        | 1973.07290 | 1.33     | 30.89    | 1                  |
|               | High                                                                 | ILDYIIVVADR              | 2          | 1                | 1.TGME49_219320          |                                  | 0.0000 | 3.39  | 0.00        | 2        | 1289.74809 | 1.30     | 35.23    | 0                  |
|               | High                                                                 | FVGLGNWCSGSYGQK          | 2          | 1                | 1.TGME49_219320          |                                  | 0.0000 | 3.20  | 0.00        | 2        | 1556.75127 | 1.28     | 33.82    | 0                  |
|               | High                                                                 | LVSSTTGETLYTHK           | 3          | 1                | 1.TGME49_219320          |                                  | 0.0000 | 3.14  | 0.00        | 2        | 1506.77947 | -0.28    | 30.58    | 0                  |
|               | High                                                                 | TELYAVTSEQIK             | 1          | 1                | 1.TGME49_219320          |                                  | 0.0000 | 2.90  | 0.00        | 2        | 1482.76995 | 0.87     | 32.74    | 0                  |
|               | High                                                                 | TVADTLK                  | 2          | 1                | 1.TGME49_219320          |                                  | 0.0000 | 2.71  | 0.00        | 1        | 747.42340  | -1.78    | 29.46    | 0                  |
|               | High                                                                 | TLLELAPK                 | 1          | 1                | 1.TGME49_219320          |                                  | 0.0000 | 2.01  | 0.00        | 1        | 771.46112  | 0.00     | 30.79    | 0                  |
| TGME49_266080 | organism=Toxoplasma_gondii_ME49   product=hypothetical protein   loc | 17.19                    | 9.62       | 1                | 6                        | 6                                | 6      | 728   | 81.1        | 8.72     |            |          |          |                    |
|               | A2                                                                   |                          |            |                  |                          |                                  |        |       |             |          |            |          |          |                    |
|               | Sequence                                                             | # PSMs                   | # Proteins | # Protein Groups | Protein Group Accessions | Modifications                    | ΔCn    | XCorr | Probability | Charge   | MH+ [Da]   | ΔM [ppm] | RT [min] | # Missed Cleavages |
|               | High                                                                 | TALFAVEGVHASK            | 1          | 1                | 1.TGME49_266080          |                                  | 0.0000 | 3.38  | 0.00        | 3        | 1329.71674 | 0.41     | 32.39    | 0                  |
|               | High                                                                 | VATEDIGVQTR              | 1          | 1                | 1.TGME49_266080          |                                  | 0.0000 | 3.09  | 0.00        | 2        | 1188.62248 | 0.45     | 30.46    | 0                  |
|               | High                                                                 | SEQETESVSR               | 1          | 1                | 1.TGME49_266080          |                                  | 0.0000 | 2.76  | 0.00        | 2        | 1151.51811 | 0.51     | 28.55    | 0                  |
|               | High                                                                 | NVPVAHVTQLR              | 1          | 1                | 1.TGME49_266080          |                                  | 0.0000 | 2.75  | 0.00        | 3        | 1283.72303 | 0.85     | 32.41    | 0                  |
|               | High                                                                 | LIVLTHQDTIK              | 1          | 1                | 1.TGME49_266080          |                                  | 0.0000 | 2.62  | 0.00        | 3        | 1280.75782 | 0.39     | 31.79    | 0                  |
|               | High                                                                 | LVQSQLNEQVPLR            | 1          | 1                | 1.TGME49_266080          |                                  | 0.0000 | 2.59  | 0.00        | 2        | 1652.89629 | -0.24    | 32.23    | 0                  |
| TGME49_235470 | organism=Toxoplasma_gondii_ME49   product=myosin A   location=TG     | 10.75                    | 5.90       | 1                | 4                        | 4                                | 4      | 831   | 93.3        | 8.16     |            |          |          |                    |
|               | A2                                                                   |                          |            |                  |                          |                                  |        |       |             |          |            |          |          |                    |
|               | Sequence                                                             | # PSMs                   | # Proteins | # Protein Groups | Protein Group Accessions | Modifications                    | ΔCn    | XCorr | Probability | Charge   | MH+ [Da]   | ΔM [ppm] | RT [min] | # Missed Cleavages |
|               | High                                                                 | LPSEEQQLGK               | 1          | 1                | 1.TGME49_235470          |                                  | 0.0000 | 2.82  | 0.00        | 2        | 1163.59441 | 0.07     | 31.14    | 0                  |
|               | High                                                                 | NPVVAQLFAGIVmEK          | 1          | 1                | 1.TGME49_235470          | M13(Oxidation)                   | 0.0000 | 2.65  | 0.00        | 3        | 1231.88517 | 1.55     | 36.07    | 0                  |
|               | High                                                                 | DGGLDDAAAEIGK            | 1          | 1                | 1.TGME49_235470          |                                  | 0.0000 | 2.64  | 0.00        | 2        | 1231.57610 | -3.31    | 31.01    | 0                  |
|               | High                                                                 | AEImEIVQQSK              | 1          | 1                | 1.TGME49_235470          | M4(Oxidation)                    | 0.0000 | 2.64  | 0.00        | 2        | 1291.65666 | 0.28     | 31.12    | 0                  |
| TGME49_223940 | organism=Toxoplasma_gondii_ME49   product=GAP45   location=TGME4     | 18.56                    | 20.00      | 1                | 4                        | 4                                | 6      | 245   | 27.3        | 5.07     |            |          |          |                    |
|               | A2                                                                   |                          |            |                  |                          |                                  |        |       |             |          |            |          |          |                    |
|               | Sequence                                                             | # PSMs                   | # Proteins | # Protein Groups | Protein Group Accessions | Modifications                    | ΔCn    | XCorr | Probability | Charge   | MH+ [Da]   | ΔM [ppm] | RT [min] | # Missed Cleavages |
|               | High                                                                 | VAHSSAAVDR               | 1          | 1                | 1.TGME49_223940          |                                  | 0.0000 | 4.75  | 0.00        | 3        | 1242.60724 | -0.10    | 28.61    | 0                  |
|               | High                                                                 | cGcDLGDQHDENEcPLcR       | 1          | 1                | 1.TGME49_223940          | C1(Carbamidomethyl); C3(Carbamic | 0.0000 | 3.04  | 0.00        | 3        | 2234.82749 | -1.97    | 30.44    | 0                  |
|               | High                                                                 | NAADKAEAR                | 1          | 1                | 1.TGME49_223940          |                                  | 0.0000 | 2.77  | 0.00        | 3        | 1074.51725 | -0.23    | 28.35    | 1                  |
|               | High                                                                 | AEAAAAAR                 | 3          | 1                | 1.TGME49_223940          |                                  | 0.0000 | 2.68  | 0.00        | 2        | 859.42693  | 0.05     | 27.99    | 0                  |

TABLE S7

| Accession     | Description                                                          | Score                     | Coverage | # Proteins | # Unique Peptides | # Peptides               | # PSMs                        | # AAs  | MW [kDa] | calc. pt    |        |            |          |          |                    |
|---------------|----------------------------------------------------------------------|---------------------------|----------|------------|-------------------|--------------------------|-------------------------------|--------|----------|-------------|--------|------------|----------|----------|--------------------|
| TGME49_223940 | organism=Toxoplasma_gondii_ME49   product=GAP45   location=TMGE4     | 161.21                    | 52.24    | 1          | 15                | 15                       | 55                            | 245    | 27.3     | 5.07        |        |            |          |          |                    |
|               | A2                                                                   | Sequence                  | # PSMs   | # Proteins | # Protein Groups  | Protein Group Accessions | Modifications                 | ΔCn    | XCorr    | Probability | Charge | MH+ [Da]   | ΔM [ppm] | RT [min] | # Missed Cleavages |
|               | High                                                                 | LSPEDSASETMTATQPK         | 1        | 1          | 1                 | 1.TGME49_223940          | M13(Oxidation)                | 0.0000 | 4.17     | 0.00        | 2      | 2007.92009 | 1.22     | 30.19    | 0                  |
|               | High                                                                 | VABHSSAAVTDR              | 6        | 1          | 1                 | 1.TGME49_223940          |                               | 0.0000 | 4.08     | 0.00        | 3      | 1242.60715 | -0.17    | 28.54    | 0                  |
|               | High                                                                 | RKAEAAAAER                | 3        | 1          | 1                 | 1.TGME49_223940          |                               | 0.0000 | 3.82     | 0.00        | 3      | 1143.62281 | -0.14    | 27.07    | 2                  |
|               | High                                                                 | KAEEAAEAER                | 3        | 1          | 1                 | 1.TGME49_223940          |                               | 0.0000 | 3.50     | 0.00        | 3      | 1174.57102 | 0.93     | 28.50    | 1                  |
|               | High                                                                 | KEAEDLAER                 | 1        | 1          | 1                 | 1.TGME49_223940          |                               | 0.0000 | 3.31     | 0.00        | 3      | 1317.66529 | 0.55     | 28.90    | 2                  |
|               | High                                                                 | KAEEAAEAER                | 7        | 1          | 1                 | 1.TGME49_223940          |                               | 0.0000 | 3.28     | 0.00        | 2      | 987.52202  | 0.17     | 24.26    | 1                  |
|               | High                                                                 | QHQEALKQEEISPR            | 1        | 1          | 1                 | 1.TGME49_223940          | M2(Oxidation); M11(Oxidation) | 0.0000 | 3.19     | 0.00        | 3      | 1736.79526 | 0.56     | 29.35    | 1                  |
|               | High                                                                 | KEAEDLAER                 | 1        | 1          | 1                 | 1.TGME49_223940          |                               | 0.0000 | 3.14     | 0.00        | 2      | 1032.52178 | 0.91     | 28.64    | 1                  |
|               | High                                                                 | AEEAAEAER                 | 1        | 1          | 1                 | 1.TGME49_223940          |                               | 0.0000 | 3.04     | 0.00        | 2      | 1046.47600 | 0.59     | 28.69    | 0                  |
|               | High                                                                 | HIDLSARLLN                | 2        | 1          | 1                 | 1.TGME49_223940          |                               | 0.0000 | 3.02     | 0.00        | 2      | 1207.62871 | -2.54    | 33.78    | 0                  |
|               | High                                                                 | AAAEAEQR                  | 16       | 1          | 1                 | 1.TGME49_223940          |                               | 0.0000 | 2.98     | 0.00        | 2      | 974.45433  | 0.52     | 27.63    | 0                  |
|               | High                                                                 | EAEELAEER                 | 1        | 1          | 1                 | 1.TGME49_223940          |                               | 0.0000 | 2.75     | 0.00        | 3      | 1189.57056 | 0.81     | 29.08    | 1                  |
|               | High                                                                 | SVVGYTVTRCDMSIDETAK       | 1        | 1          | 1                 | 1.TGME49_223940          | C10(Carbamidomethyl)          | 0.0000 | 2.73     | 0.00        | 3      | 2143.99198 | 1.53     | 32.59    | 0                  |
|               | High                                                                 | VABHSSAAVTDR              | 1        | 1          | 1                 | 1.TGME49_223940          | SS(Phospho)                   | 0.0000 | 2.72     | 0.00        | 3      | 1322.57224 | -1.10    | 28.83    | 0                  |
|               | High                                                                 | AEEAAEAER                 | 9        | 1          | 1                 | 1.TGME49_223940          |                               | 0.0000 | 2.69     | 0.00        | 2      | 859.42887  | -0.02    | 27.16    | 0                  |
|               | High                                                                 | NAADKAEER                 | 1        | 1          | 1                 | 1.TGME49_223940          |                               | 0.0000 | 2.63     | 0.00        | 2      | 1074.51948 | 0.92     | 28.29    | 1                  |
| TGME49_219320 | organism=Toxoplasma_gondii_ME49   product=acid phosphatase GAP50     | 42.14                     | 31.09    | 1          | 10                | 10                       | 13                            | 431    | 46.6     | 6.95        |        |            |          |          |                    |
|               | A2                                                                   | Sequence                  | # PSMs   | # Proteins | # Protein Groups  | Protein Group Accessions | Modifications                 | ΔCn    | XCorr    | Probability | Charge | MH+ [Da]   | ΔM [ppm] | RT [min] | # Missed Cleavages |
|               | High                                                                 | HSGSLYYAGETGFCFLTAAGLVTR  | 1        | 1          | 1                 | 1.TGME49_219320          | C14(Carbamidomethyl)          | 0.0000 | 4.92     | 0.00        | 3      | 2878.37473 | 1.04     | 36.59    | 0                  |
|               | High                                                                 | TELYAVTSEQIKDKG           | 1        | 1          | 1                 | 1.TGME49_219320          |                               | 0.0000 | 3.79     | 0.00        | 3      | 1782.91239 | 0.19     | 31.56    | 1                  |
|               | High                                                                 | LVSGETGETLYTHK            | 1        | 1          | 1                 | 1.TGME49_219320          |                               | 0.0000 | 3.39     | 0.00        | 2      | 1506.77995 | 0.04     | 30.62    | 0                  |
|               | High                                                                 | ILDYIIVVADR               | 1        | 1          | 1                 | 1.TGME49_219320          |                               | 0.0000 | 3.35     | 0.00        | 2      | 1289.74626 | -0.12    | 35.19    | 0                  |
|               | High                                                                 | LAPADATEAAAAENHGYPK       | 2        | 1          | 1                 | 1.TGME49_219320          |                               | 0.0000 | 3.33     | 0.00        | 4      | 1896.90639 | -1.23    | 31.09    | 0                  |
|               | High                                                                 | GDSMLQYLYQLLK             | 2        | 1          | 1                 | 1.TGME49_219320          | M4(Oxidation)                 | 0.0000 | 3.04     | 0.00        | 2      | 1694.86162 | 0.06     | 35.49    | 0                  |
|               | High                                                                 | LVSGETGETLYTHKQPLK        | 1        | 1          | 1                 | 1.TGME49_219320          |                               | 0.0000 | 2.99     | 0.00        | 4      | 1973.06875 | -0.78    | 30.97    | 1                  |
|               | High                                                                 | SIDAFNFVSQLPEVR           | 2        | 1          | 1                 | 1.TGME49_219320          |                               | 0.0000 | 2.91     | 0.00        | 2      | 1721.89275 | 4.04     | 35.78    | 0                  |
|               | High                                                                 | FVGLGNWGSQSYGQK           | 1        | 1          | 1                 | 1.TGME49_219320          |                               | 0.0000 | 2.89     | 0.00        | 2      | 1556.75420 | 3.16     | 33.80    | 0                  |
|               | High                                                                 | TELYAVTSEQIK              | 1        | 1          | 1                 | 1.TGME49_219320          |                               | 0.0000 | 2.56     | 0.00        | 3      | 1482.76947 | 0.55     | 32.29    | 0                  |
| TGME49_235470 | organism=Toxoplasma_gondii_ME49   product=myosin A   location=TMGE4  | 10.96                     | 5.78     | 1          | 4                 | 4                        | 4                             | 831    | 93.3     | 8.16        |        |            |          |          |                    |
|               | A2                                                                   | Sequence                  | # PSMs   | # Proteins | # Protein Groups  | Protein Group Accessions | Modifications                 | ΔCn    | XCorr    | Probability | Charge | MH+ [Da]   | ΔM [ppm] | RT [min] | # Missed Cleavages |
|               | High                                                                 | ELIFTSNAEVK               | 1        | 1          | 1                 | 1.TGME49_235470          |                               | 0.0000 | 2.95     | 0.00        | 2      | 1363.74565 | -0.86    | 33.76    | 0                  |
|               | High                                                                 | AEImEIVQQSK               | 1        | 1          | 1                 | 1.TGME49_235470          | M4(Oxidation)                 | 0.0000 | 2.78     | 0.00        | 2      | 1291.65691 | 0.47     | 31.18    | 0                  |
|               | High                                                                 | LPSEEVQLGK                | 1        | 1          | 1                 | 1.TGME49_235470          |                               | 0.0000 | 2.70     | 0.00        | 2      | 1163.59502 | 0.60     | 31.16    | 0                  |
|               | High                                                                 | NPVVAQLFAGIVmEK           | 1        | 1          | 1                 | 1.TGME49_235470          | M13(Oxidation)                | 0.0000 | 2.53     | 0.00        | 3      | 1631.88553 | 1.77     | 36.05    | 0                  |
| TGME49_257680 | organism=Toxoplasma_gondii_ME49   product=myosin light chain MLC1    | 2.90                      | 12.21    | 1          | 1                 | 1                        | 1                             | 213    | 24.1     | 4.65        |        |            |          |          |                    |
|               | A2                                                                   | Sequence                  | # PSMs   | # Proteins | # Protein Groups  | Protein Group Accessions | Modifications                 | ΔCn    | XCorr    | Probability | Charge | MH+ [Da]   | ΔM [ppm] | RT [min] | # Missed Cleavages |
|               | High                                                                 | FVGTSTHPEDNIEDLVEAFYFDVSK | 1        | 1          | 1                 | 1.TGME49_257680          |                               | 0.0000 | 2.90     | 0.00        | 3      | 2930.38053 | 2.51     | 36.63    | 0                  |
| TGME49_318230 | organism=Toxoplasma_gondii_ME49   product=phosphoglycerate kinase    | 2.60                      | 3.12     | 1          | 1                 | 1                        | 1                             | 417    | 44.6     | 6.99        |        |            |          |          |                    |
|               | A2                                                                   | Sequence                  | # PSMs   | # Proteins | # Protein Groups  | Protein Group Accessions | Modifications                 | ΔCn    | XCorr    | Probability | Charge | MH+ [Da]   | ΔM [ppm] | RT [min] | # Missed Cleavages |
|               | High                                                                 | LGIQDVGAQLTGK             | 1        | 1          | 1                 | 1.TGME49_318230          |                               | 0.0000 | 2.60     | 0.00        | 2      | 1299.72795 | 0.92     | 33.52    | 0                  |
| TGME49_209030 | organism=Toxoplasma_gondii_ME49   product=actin ACT1 (ACT1)   loc    | 2.59                      | 2.66     | 1          | 1                 | 1                        | 1                             | 376    | 41.9     | 5.16        |        |            |          |          |                    |
|               | A2                                                                   | Sequence                  | # PSMs   | # Proteins | # Protein Groups  | Protein Group Accessions | Modifications                 | ΔCn    | XCorr    | Probability | Charge | MH+ [Da]   | ΔM [ppm] | RT [min] | # Missed Cleavages |
|               | High                                                                 | AGVAGDDAQR                | 1        | 1          | 1                 | 1.TGME49_209030          |                               | 0.0000 | 2.59     | 0.00        | 2      | 928.44798  | -0.39    | 28.92    | 0                  |
| TGME49_266080 | organism=Toxoplasma_gondii_ME49   product=hypothetical protein   loc | 2.59                      | 1.51     | 1          | 1                 | 1                        | 1                             | 728    | 81.1     | 8.72        |        |            |          |          |                    |
|               | A2                                                                   | Sequence                  | # PSMs   | # Proteins | # Protein Groups  | Protein Group Accessions | Modifications                 | ΔCn    | XCorr    | Probability | Charge | MH+ [Da]   | ΔM [ppm] | RT [min] | # Missed Cleavages |
|               | High                                                                 | VATEDIGVQTR               | 1        | 1          | 1                 | 1.TGME49_266080          |                               | 0.0000 | 2.59     | 0.00        | 2      | 1188.62261 | 0.55     | 30.42    | 0                  |



TABLE S9

| Accession     | Description                                                                                                                                           | Score                    | Coverage | # Proteins | # Unique Peptides | # Peptides               | # PSMs         | # AAs  | MW [kDa] | calc. pt    |        |            |          |          |                    |
|---------------|-------------------------------------------------------------------------------------------------------------------------------------------------------|--------------------------|----------|------------|-------------------|--------------------------|----------------|--------|----------|-------------|--------|------------|----------|----------|--------------------|
| TGME49_267430 | organism=Toxoplasma_gondii_ME49   product=DnaI domain-containing protein   location=TGME49_chrx:65532-662192(+)   length=625   sequence_SO=chromosome | 47.73                    | 25.41    | 11         | 11                | 11                       | 425            | 463    | 8.82     |             |        |            |          |          |                    |
|               | A2                                                                                                                                                    | Sequence                 | # PSMs   | # Proteins | # Protein Groups  | Protein Group Accessions | Modifications  | ΔCn    | XCorr    | Probability | Charge | MH+ [Da]   | ΔM [ppm] | RT [min] | # Missed Cleavages |
|               | High                                                                                                                                                  | KAQEVLMSDTR              | 1        | 1          | 1                 | TGME49_267430            | M7(Oxidation)  | 0.0000 | 3.22     | 0.00        | 2      | 1251.64714 | 0.27     | 29.45    | 1                  |
|               | High                                                                                                                                                  | TQQQMTHLK                | 2        | 1          | 1                 | TGME49_267430            |                | 0.0000 | 2.98     | 0.00        | 3      | 1242.62529 | 0.25     | 29.44    | 0                  |
|               | High                                                                                                                                                  | NDLQAYR                  | 3        | 1          | 1                 | TGME49_267430            |                | 0.0000 | 2.90     | 0.00        | 2      | 992.51702  | 1.02     | 33.08    | 0                  |
|               | High                                                                                                                                                  | AQEVLMSDTR               | 1        | 1          | 1                 | TGME49_267430            |                | 0.0000 | 2.67     | 0.00        | 2      | 1149.55681 | -0.09    | 30.75    | 0                  |
|               | High                                                                                                                                                  | KAQEVLMSDTR              | 2        | 1          | 1                 | TGME49_267430            |                | 0.0000 | 2.49     | 0.00        | 2      | 1277.65527 | 2.88     | 30.42    | 1                  |
|               | High                                                                                                                                                  | VAAASGASGAVFQRPSPFSK     | 1        | 1          | 1                 | TGME49_267430            |                | 0.0000 | 2.46     | 0.00        | 4      | 1886.97463 | 1.39     | 33.90    | 0                  |
|               | High                                                                                                                                                  | TTrGTPTAAIK              | 1        | 1          | 1                 | TGME49_267430            |                | 0.0000 | 2.46     | 0.00        | 2      | 1093.55627 | 0.66     | 29.83    | 0                  |
|               | High                                                                                                                                                  | ASSQRPSQSETKPASATQK      | 1        | 1          | 1                 | TGME49_267430            | M2(Oxidation)  | 0.0000 | 2.41     | 0.00        | 4      | 1988.99941 | -0.12    | 28.72    | 0                  |
|               | High                                                                                                                                                  | mTNEEFFMEIK              | 1        | 1          | 1                 | TGME49_267430            | M1(Oxidation)  | 0.0000 | 2.27     | 0.00        | 2      | 1434.63030 | 1.57     | 34.47    | 0                  |
|               | High                                                                                                                                                  | TQQQMTHLK                | 3        | 1          | 1                 | TGME49_267430            |                | 0.0000 | 2.26     | 0.00        | 3      | 1258.62091 | 0.02     | 28.37    | 0                  |
|               | High                                                                                                                                                  | AQEVLMSDTR               | 1        | 1          | 1                 | TGME49_267430            | M6(Oxidation)  | 0.0000 | 2.23     | 0.00        | 2      | 1165.55278 | 0.82     | 29.76    | 0                  |
|               | High                                                                                                                                                  | mDEVLQK                  | 1        | 1          | 1                 | TGME49_267430            | M1(Oxidation)  | 0.0000 | 2.07     | 0.00        | 2      | 906.43486  | -0.15    | 29.59    | 0                  |
|               | High                                                                                                                                                  | VYATLTK                  | 1        | 1          | 1                 | TGME49_267430            |                | 0.0000 | 1.93     | 0.00        | 1      | 694.41376  | 0.48     | 30.19    | 0                  |
|               | High                                                                                                                                                  | FDYIK                    | 1        | 1          | 1                 | TGME49_267430            |                | 0.0000 | 1.60     | 0.00        | 1      | 625.25237  | 0.48     | 29.47    | 0                  |
| TGME49_235470 | organism=Toxoplasma_gondii_ME49   product=myosin A   location=TGME49_chrx:4894161-489835(+)   length=831   sequence_SO=chromosome   SO=protein        | 23.37                    | 8.06     | 1          | 7                 | 7                        | 831            | 933    | 8.16     |             |        |            |          |          |                    |
|               | A2                                                                                                                                                    | Sequence                 | # PSMs   | # Proteins | # Protein Groups  | Protein Group Accessions | Modifications  | ΔCn    | XCorr    | Probability | Charge | MH+ [Da]   | ΔM [ppm] | RT [min] | # Missed Cleavages |
|               | High                                                                                                                                                  | RALDNLHVNK               | 1        | 1          | 1                 | TGME49_235470            |                | 0.0000 | 3.24     | 0.00        | 3      | 1250.69703 | 0.46     | 30.28    | 1                  |
|               | High                                                                                                                                                  | YRDTFDLSK                | 2        | 1          | 1                 | TGME49_235470            |                | 0.0000 | 3.09     | 0.00        | 3      | 1144.56461 | 1.10     | 31.24    | 1                  |
|               | High                                                                                                                                                  | SQTTIVSGSGAGK            | 1        | 1          | 1                 | TGME49_235470            |                | 0.0000 | 2.97     | 0.00        | 2      | 1333.69670 | 0.64     | 30.60    | 0                  |
|               | High                                                                                                                                                  | ALDNLHVNK                | 2        | 1          | 1                 | TGME49_235470            |                | 0.0000 | 2.63     | 0.00        | 3      | 1094.59549 | 0.15     | 30.32    | 0                  |
|               | High                                                                                                                                                  | GRQWITDLASPSK            | 1        | 1          | 1                 | TGME49_235470            |                | 0.0000 | 2.26     | 0.00        | 2      | 1461.77449 | -0.15    | 35.66    | 0                  |
|               | High                                                                                                                                                  | LAPHWFYIAR               | 1        | 1          | 1                 | TGME49_235470            |                | 0.0000 | 2.24     | 0.00        | 3      | 1174.63620 | -0.50    | 31.83    | 0                  |
|               | High                                                                                                                                                  | FHLPLSEYK                | 1        | 1          | 1                 | TGME49_235470            |                | 0.0000 | 2.22     | 0.00        | 3      | 1246.68280 | -0.21    | 34.29    | 0                  |
| TGME49_257680 | organism=Toxoplasma_gondii_ME49   product=myosin light chain MLC1   location=TGME49_chrv:3911250-3911392(-)   length=213   sequence_SO=chromosome     | 28.23                    | 34.27    | 1          | 5                 | 5                        | 213            | 24.1   | 4.65     |             |        |            |          |          |                    |
|               | A2                                                                                                                                                    | Sequence                 | # PSMs   | # Proteins | # Protein Groups  | Protein Group Accessions | Modifications  | ΔCn    | XCorr    | Probability | Charge | MH+ [Da]   | ΔM [ppm] | RT [min] | # Missed Cleavages |
|               | High                                                                                                                                                  | FVGTSTHPENIEKLVEAFYFDVSK | 3        | 1          | 1                 | TGME49_257680            |                | 0.0000 | 5.66     | 0.00        | 3      | 2930.37870 | 1.88     | 36.80    | 0                  |
|               | High                                                                                                                                                  | LHPKNDLSPYMEIK           | 2        | 1          | 1                 | TGME49_257680            | M11(Oxidation) | 0.0000 | 3.20     | 0.00        | 2      | 1302.69880 | 0.28     | 33.62    | 0                  |
|               | High                                                                                                                                                  | QLGLAPSYADK              | 1        | 1          | 1                 | TGME49_257680            |                | 0.0000 | 2.25     | 0.00        | 2      | 1162.61431 | 3.44     | 31.62    | 0                  |
|               | High                                                                                                                                                  | SGDNLVYASFGK             | 1        | 1          | 1                 | TGME49_257680            |                | 0.0000 | 2.24     | 0.00        | 2      | 1344.60527 | -1.05    | 31.83    | 0                  |
|               | High                                                                                                                                                  | VSTGDAMILAR              | 1        | 1          | 1                 | TGME49_257680            | M7(Oxidation)  | 0.0000 | 2.19     | 0.00        | 2      | 1149.59392 | 0.53     | 31.17    | 0                  |
|               | High                                                                                                                                                  | VSTGDAMILAR              | 1        | 1          | 1                 | TGME49_257680            |                | 0.0000 | 2.14     | 0.00        | 2      | 1133.59990 | 1.33     | 32.36    | 0                  |
| TGME49_223940 | organism=Toxoplasma_gondii_ME49   product=GAP45   location=TGME49_chrx:3440541-3441278(-)   length=245   sequence_SO=chromosome   SO=protein_c        | 6.59                     | 9.39     | 1          | 2                 | 2                        | 245            | 27.3   | 5.07     |             |        |            |          |          |                    |
|               | A2                                                                                                                                                    | Sequence                 | # PSMs   | # Proteins | # Protein Groups  | Protein Group Accessions | Modifications  | ΔCn    | XCorr    | Probability | Charge | MH+ [Da]   | ΔM [ppm] | RT [min] | # Missed Cleavages |
|               | High                                                                                                                                                  | VAHSSAAVTIR              | 1        | 1          | 1                 | TGME49_223940            |                | 0.0000 | 4.03     | 0.00        | 3      | 1242.60761 | 0.20     | 28.92    | 0                  |
|               | High                                                                                                                                                  | VKAEDALEAR               | 1        | 1          | 1                 | TGME49_223940            |                | 0.0000 | 2.56     | 0.00        | 2      | 1174.56999 | 0.05     | 28.76    | 1                  |
| TGME49_312990 | organism=Toxoplasma_gondii_ME49   product=DEAD/DEAH box ATP-dependent RNA helicase   location=TGME49_chrx1:3020716-3025702(-)   length=569   sau      | 1.71                     | 1.23     | 1          | 1                 | 1                        | 569            | 638    | 8.94     |             |        |            |          |          |                    |
|               | A2                                                                                                                                                    | Sequence                 | # PSMs   | # Proteins | # Protein Groups  | Protein Group Accessions | Modifications  | ΔCn    | XCorr    | Probability | Charge | MH+ [Da]   | ΔM [ppm] | RT [min] | # Missed Cleavages |
|               | High                                                                                                                                                  | DVLGAAK                  | 1        | 1          | 1                 | TGME49_312990            |                | 0.0000 | 1.71     | 0.00        | 1      | 673.38788  | -0.12    | 29.20    | 0                  |

TABLE S10

| Accession     | Description                                                       | Score  | Coverage   | # Proteins       | # Unique Peptides        | # Peptides                       | # PSMs | # AAs | MW [kDa]    | calc. pI |            |          |          |                    |
|---------------|-------------------------------------------------------------------|--------|------------|------------------|--------------------------|----------------------------------|--------|-------|-------------|----------|------------|----------|----------|--------------------|
| TGME49_257680 | organism=Toxoplasma_gondii_ME49   product=myosin light chain MLC1 | 124.70 | 81.22      | 1                | 10                       | 10                               | 43     | 213   | 24.1        | 4.65     |            |          |          |                    |
| A2            | Sequence                                                          | # PSMs | # Proteins | # Protein Groups | Protein Group Accessions | Modifications                    | ΔCn    | XCorr | Probability | Charge   | MH+ [Da]   | ΔM [ppm] | RT [min] | # Missed Cleavages |
| High          | FVGTSTHPEDNIEDLVEAFYFDVSK                                         | 3      | 1          | 1                | TGME49_257680            |                                  | 0.0000 | 7.15  | 0.00        | 3        | 2930.38053 | 2.51     | 36.57    | 0                  |
| High          | SGDNLDYASQK                                                       | 2      | 1          | 1                | TGME49_257680            |                                  | 0.0000 | 3.70  | 0.00        | 2        | 1344.60820 | 1.13     | 31.84    | 0                  |
| High          | ELNYFMWMPGFEWRPEK                                                 | 1      | 1          | 1                | TGME49_257680            |                                  | 0.0000 | 3.51  | 0.00        | 3        | 2357.09269 | 1.86     | 36.53    | 0                  |
| High          | VSTGDAMILAR                                                       | 6      | 1          | 1                | TGME49_257680            |                                  | 0.0000 | 3.33  | 0.00        | 2        | 1133.59978 | 1.22     | 32.34    | 0                  |
| High          | KQmGNILnTYGEPLTTEFNALAAEYf                                        | 1      | 1          | 1                | TGME49_257680            | M3(Oxidation); M8(Oxidation)     | 0.0000 | 3.27  | 0.00        | 3        | 4091.90659 | 4.29     | 36.46    | 1                  |
| High          | VSTGDAmILAR                                                       | 13     | 1          | 1                | TGME49_257680            | M7(Oxidation)                    | 0.0000 | 3.18  | 0.00        | 2        | 1149.59477 | 1.28     | 31.12    | 0                  |
| High          | LPNPADVLGRmDK                                                     | 2      | 1          | 1                | TGME49_257680            | M11(Oxidation)                   | 0.0000 | 3.05  | 0.00        | 2        | 1382.70012 | 1.16     | 33.32    | 0                  |
| High          | EGRRPAEDEmQEALEmVEADMYA                                           | 1      | 1          | 1                | TGME49_257680            | M11(Oxidation); M18(Oxidation)   | 0.0000 | 2.64  | 0.00        | 3        | 3074.27085 | 1.52     | 33.54    | 0                  |
| High          | QLGLAPSYADK                                                       | 8      | 1          | 1                | TGME49_257680            |                                  | 0.0000 | 2.60  | 0.00        | 2        | 1162.61150 | 1.02     | 31.59    | 0                  |
| High          | HGYLTR                                                            | 4      | 1          | 1                | TGME49_257680            |                                  | 0.0000 | 2.23  | 0.00        | 2        | 746.39354  | -1.17    | 29.41    | 0                  |
| High          | LPNPADVLGPMDK                                                     | 1      | 1          | 1                | TGME49_257680            |                                  | 0.0000 | 2.15  | 0.00        | 2        | 1366.70085 | -2.01    | 34.04    | 0                  |
| High          | VGEYDGAcEFPSc-R                                                   | 1      | 1          | 1                | TGME49_257680            | C8(Carbamidomethyl); C13(Carbami | 0.0000 | 2.05  | 0.00        | 2        | 1586.62053 | -0.33    | 29.59    | 0                  |

## Supplementary Table 11: Oligonucleotides used in this study

| S.No | Name of the primer              | Oligo sequence                                                                                                   |
|------|---------------------------------|------------------------------------------------------------------------------------------------------------------|
| 1    | TgMLC1C8Arev                    | 5'-tagcacaccggggctttctctcgacctgctcatct-3'                                                                        |
| 2    | TgMLC1C11Afw                    | 5'-gaagaaatgccgggtggcctaccagaagctgccg-3'                                                                         |
| 3    | TgMLC1C11Arev                   | 5'-cggcagcttctgtaggccaccgggcatttcttc-3'                                                                          |
| 4    | TgMLC1C8C11Afw                  | 5'-gagcaaggtcgagaagaaagccccgggtggcctaccagaagctg-3'                                                               |
| 5    | TgMLC1C8C11Arev                 | 5'-cagcttctgtaggccaccggggctttctctcgacctgctc-3'                                                                   |
| 6    | TgMLC1C8Sfw                     | 5'-gagcaaggtcgagaagaaaagccccgggtg-3'                                                                             |
| 7    | TgMLC1C8Srev                    | 5'-cacaccgggctttctctcgacctgctc-3'                                                                                |
| 8    | TgMLC1C11Sfw                    | 5'-aagaaatgccgggtgagctaccagaagctgc-3'                                                                            |
| 9    | TgMLC1C11Srev                   | 5'-gcagcttctgtagctcaccgggcatttctt-3'                                                                             |
| 10   | TgMLC1C8SC11Sfw                 | 5'-gcaaggtcgagaagaaaagccccgggtgagctaccaga-3'                                                                     |
| 11   | TgMLC1C8SC11Srev                | 5'-tctgtagctcaccgggctttctctcgacctgc-3'                                                                           |
| 12   | PS235470-TyF                    | 5'-aagttgaaacgaacgtgtctagaacgcg-3'                                                                               |
| 13   | PS235470-TyR                    | 5'-aaaacggttctagacacgttcgttca-3'                                                                                 |
| 14   | MyoATy-Fwd                      | 5'-gaaacgaacgtgtctagaacg-3'                                                                                      |
| 15   | MyoATy-Rev                      | 5'-ggcgccagaaacaggtcggc-3'                                                                                       |
| 16   | MyoATy-Seq                      | 5'-ctgacacatccccttcgtgcg-3'                                                                                      |
| 17   | pSS013-Fwd                      | 5'-ccccgacaccgcccaacaccgcg-3'                                                                                    |
| 18   | MyoAPS-Rev                      | 5'-gcttctagacacgttcgttcc-3'                                                                                      |
| 19   | MyoAgDNA-seqF                   | 5'-cgtatatagtagcgatgtagg-3'                                                                                      |
| 20   | MyoATygDNA-F                    | 5'-ctcgggaagacaatggtttc-3'                                                                                       |
| 21   | MyoATygDNA-R                    | 5'-gagtgatcctggtcgtg-3'                                                                                          |
| 22   | MyoAgDNA-R                      | 5'-gagccacggactgacaccatc-3'                                                                                      |
| 23   | HR MyoA-TyF2                    | 5'-aatggatgagaagagttcaaaaggcaaacgaacgtgtctagagtgatcctggtcgtggaactccaggaacgccggctgaacagtcgccccgctgacgtgtgtcc-3'   |
| 24   | HR MyoA-TyR2                    | 5'-ggacaacaacgtcagccccgcgactgtcagccggcgttctggaagttcacacgaaccaggatccactctagacacgttcgttgcctttgaaactctctcatccatt-3' |
| 25   | P1: TgMLC15'flankupstrFwd       | 5' -aatgccgtagcaggcagca-3'                                                                                       |
| 26   | P2: GRA1BgIIIRev                | 5'-gctagccgagatcttctgatttctcaag-3'                                                                               |
| 27   | P3: TgMLC1+1587(Exon3Start)Fwd  | 5'-cacaagtgaccagatcgactacag-3'                                                                                   |
| 28   | P4: TgMLC13'flankdownstr+829Rev | 5'-ccttcaagtcggtcgcaacct-3'                                                                                      |
